# Supplementary material for: A census of human cancer genes
Source: Springer Nature journal article supplement (doi:10.1038/nrc1299), 2004-03-01
Supplement: 41568_2004_BFnrc1299_MOESM1_ESM.pdf [file 41568_2004_BFnrc1299_MOESM1_ESM.pdf]

| Symbol    | Locuslink ID | Protein ID* | Chromosome band | Tumour types (somatic mutations)                                   | Tumour types (germline mutations)                                  | Cancer syndrome                             | Tissue type | Cancer molecular genetics | Mutation type                 | Translocation partner                                                                                |
|-----------|--------------|-------------|-----------------|--------------------------------------------------------------------|--------------------------------------------------------------------|---------------------------------------------|-------------|---------------------------|-------------------------------|------------------------------------------------------------------------------------------------------|
| ABL1      | 25           | P00519      | 9q34.1          | CML, ALL                                                           | -                                                                  | -                                           | L           | Dom                       | T                             | BCR, ETV6                                                                                            |
| ABL2      | 27           | P42684      | 1q24-q25        | AML                                                                | -                                                                  | -                                           | L           | Dom                       | T                             | ETV6                                                                                                 |
| AF15Q14   | 57082        | NP_065113   | 15q14           | AML                                                                | -                                                                  | -                                           | L           | Dom                       | T                             | MLL                                                                                                  |
| AF1Q      | 10962        | Q13015      | 1q21            | ALL                                                                | -                                                                  | -                                           | L           | Dom                       | T                             | MLL                                                                                                  |
| AF3p21    | 51517        | Q9NZQ3      | 3p21            | ALL                                                                | -                                                                  | -                                           | L           | Dom                       | T                             | MLL                                                                                                  |
| AF5q31    | 27125        | NP_055238   | 5q31            | ALL                                                                | -                                                                  | -                                           | L           | Dom                       | T                             | MLL                                                                                                  |
| AKT2      | 208          | P31751      | 19q13.1-q13.2   | Ovarian, pancreatic                                                | -                                                                  | -                                           | E           | Dom                       | A                             | -                                                                                                    |
| ALK       | 238          | Q9UM73      | 2p23            | ALCL                                                               | -                                                                  | -                                           | L           | Dom                       | T                             | NPM1, TPM3, TFG, TPM4, ATIC, CLTC, MSN, ALO17                                                        |
| ALO17     | 57714        | XP_290769   | 17q25.3         | ALCL                                                               | -                                                                  | -                                           | L           | Dom                       | T                             | ALK                                                                                                  |
| APC       | 324          | P25054      | 5q21            | Colorectal, pancreatic, desmoid, hepatoblastoma, glioma, other CNS | Colorectal, pancreatic, desmoid, hepatoblastoma, glioma, other CNS | Adenomatous polyposis coli; Turcot syndrome | E, M, O     | Rec                       | D <sup>+</sup> , Mis, N, F, S | -                                                                                                    |
| ARRHGEF12 | 23365        | NP_056128   | 11q23.3         | AML                                                                | -                                                                  | -                                           | L           | Dom                       | T                             | MLL                                                                                                  |
| ARRH      | 399          | Q15669      | 4p13            | NHL                                                                | -                                                                  | -                                           | L           | Dom                       | T                             | BCL6                                                                                                 |
| ARRNT     | 405          | P27540      | 1q21            | AML                                                                | -                                                                  | -                                           | L           | Dom                       | T                             | ETV6                                                                                                 |
| ASPSOR1   | 79058        | NP_076988   | 17q25           | Aveolar soft part sarcoma                                          | -                                                                  | -                                           | M           | Dom                       | T                             | TFE3                                                                                                 |
| ATF1      | 466          | P18846      | 12q13           | Malignant melanoma of soft parts; angiomatoid fibrous histiocytoma | -                                                                  | -                                           | E, M        | Dom                       | T                             | EWSR1                                                                                                |
| ATTC      | 471          | P31939      | 2q35            | ALCL                                                               | -                                                                  | -                                           | L           | Dom                       | T                             | ALK                                                                                                  |
| ATM       | 472          | Q13315      | 11q22.3         | T-PLL                                                              | Leukaemia, lymphoma, medulloblastoma, glioma                       | Ataxia telangiectasia                       | L, O        | Rec                       | D, Mis, N, F, S               | -                                                                                                    |
| BCL10     | 8915         | O95999      | 1p22            | MALT                                                               | -                                                                  | -                                           | L           | Dom                       | T                             | IGH $\alpha$                                                                                         |
| BCL11A    | 53335        | NP_060484   | 2p13            | B-CLL                                                              | -                                                                  | -                                           | L           | Dom                       | T                             | IGH $\alpha$                                                                                         |
| BCL11B    | 64919        | NP_612808   | 14q32.1         | T-ALL                                                              | -                                                                  | -                                           | L           | Dom                       | T                             | TLX3                                                                                                 |
| BCL2      | 596          | P10415      | 18q21.3         | NHL, CLL                                                           | -                                                                  | -                                           | L           | Dom                       | T                             | IGH $\alpha$                                                                                         |
| BCL3      | 602          | P20749      | 19q13           | CLL                                                                | -                                                                  | -                                           | L           | Dom                       | T                             | IGH $\alpha$                                                                                         |
| BCL5      | 603          | I52586      | 17q22           | CLL                                                                | -                                                                  | -                                           | L           | Dom                       | T                             | MYC                                                                                                  |
| BCL6      | 604          | P41182      | 3q27            | NHL, CLL                                                           | -                                                                  | -                                           | L           | Dom                       | T, Mis                        | IG loci, ZNF117, LCP1, PM1, TFRG, MHC2TA, NACA, HSPCB, HSPCA, HIST1H4L, IL21R, POU2AF1, ARHH, ERF4A2 |
| BCL7A     | 605          | NP_066273   | 12q24.1         | B-NHL                                                              | -                                                                  | -                                           | L           | Dom                       | T                             | MYC                                                                                                  |
| BCL9      | 607          | O00512      | 1q21            | B-ALL                                                              | -                                                                  | -                                           | L           | Dom                       | T                             | IGH $\alpha$ , IGL $\alpha$                                                                          |
| BCR       | 613          | P11274      | 22q11.21        | CML, ALL                                                           | -                                                                  | -                                           | L           | Dom                       | T                             | ABL1, FGFR1                                                                                          |
| BHD       | 201163       | NP_659434   | 17p11.2         | -                                                                  | Renal, fibrofolliculomas, trichodiscomas                           | Birt-Hogg-Dube syndrome                     | E, M        | Rec?                      | Mis, N, F                     | -                                                                                                    |
| BIRC3     | 330          | Q13489      | 11q22-q23       | MALT                                                               | -                                                                  | -                                           | L           | Dom                       | T                             | MALT1                                                                                                |

|                             |       |           |               |                                                                                        |                                                                          |                              |               |     |                 |                      |
|-----------------------------|-------|-----------|---------------|----------------------------------------------------------------------------------------|--------------------------------------------------------------------------|------------------------------|---------------|-----|-----------------|----------------------|
| BLM                         | 641   | P54132    | 15q26.1       | -                                                                                      | Leukaemia, lymphoma, skin squamous cell, other cancers                   | Bloom Syndrome               | L, E          | Rec | Mis, N, F       | -                    |
| BMP1A                       | 657   | P36894    | 10q22.3       | -                                                                                      | Gastrointestinal polyps                                                  | Juvenile polyposis           | E             | Rec | Mis, N, F       | -                    |
| BRAF                        | 673   | P15056    | 7q34          | Melanoma, colorectal, papillary thyroid, borderline ovarian, NSCLC, cholangiocarcinoma | -                                                                        | -                            | E             | Dom | M               | -                    |
| BRCA1                       | 672   | P38398    | 17q21         | Ovarian                                                                                | Breast, ovarian                                                          | Hereditary breast/ovarian    | E             | Rec | D, Mis, N, F, S | -                    |
| BRCA2                       | 675   | P51587    | 13q12         | Breast, ovarian, pancreatic                                                            | Breast, ovarian, pancreatic, hereditary breast/leukaemia (FANCB, FANCD1) | Hereditary breast/ovarian    | L, E, ovarian | Rec | D, Mis, N, F, S | -                    |
| BRD4                        | 23476 | O60885    | 19p13.1       | Lethal midline carcinoma of young people                                               | -                                                                        | -                            | E             | Dom | T               | NUT                  |
| BTG1                        | 694   | P31607    | 12q22         | BCLL                                                                                   | -                                                                        | -                            | L             | Dom | T               | MYC                  |
| CBFA2T1                     | 862   | Q06455    | 8q22          | AML                                                                                    | -                                                                        | -                            | L             | Dom | T               | MLL, RUNX1           |
| CBFA2T3                     | 863   | NP_005178 | 16q24         | AML                                                                                    | -                                                                        | -                            | L             | Dom | T               | RUNX1                |
| CBFB                        | 865   | Q13951    | 16q22         | AML                                                                                    | -                                                                        | -                            | L             | Dom | T               | MYH11                |
| CBL                         | 867   | P22681    | 11q23.3       | AML                                                                                    | -                                                                        | -                            | L             | Dom | T               | MLL                  |
| CCND1                       | 595   | P24385    | 11q13         | CLL, B-ALL, breast                                                                     | -                                                                        | -                            | L, E          | Dom | T               | IGH $\alpha$ , FSTL3 |
| CDH1                        | 999   | P12830    | 16q22.1       | Lobular breast, gastric                                                                | Gastric                                                                  | Familial gastric carcinoma E | E             | Rec | Mis, N, F, S    | -                    |
| CDK4                        | 1019  | P11802    | 12q14         | -                                                                                      | Melanoma                                                                 | Familial malignant melanoma  | E             | Dom | Mis             | -                    |
| CDKN2A-p14 <sup>ARF</sup>   | 1029  | NP_478102 | 9p21          | Melanoma, multiple other                                                               | Melanoma, pancreatic                                                     | Familial malignant melanoma  | L, E, M, O    | Rec | D, S            | -                    |
| CDKN2A-p16 <sup>INK4A</sup> | 1029  | P42771    | 9p21          | Melanoma, multiple other                                                               | Melanoma, pancreatic                                                     | Familial malignant melanoma  | L, E, M, O    | Rec | D, Mis, N, F, S | -                    |
| CDX2                        | 1045  | Q99626    | 13q12.3       | AML                                                                                    | -                                                                        | -                            | L             | Dom | T               | ETV6                 |
| CEBPA                       | 1050  | NP_004355 | 11p15.5       | AML, MDS                                                                               | -                                                                        | -                            | L             | Dom | Mis, N, F       | -                    |
| CEP1                        | 11064 | NP_008949 | 9q33          | M/PP/NHL                                                                               | -                                                                        | -                            | L             | Dom | T               | FGFR1                |
| CHIC2                       | 26511 | NP_036242 | 4q11-q12      | AML                                                                                    | -                                                                        | -                            | L             | Dom | T               | ETV6                 |
| CHN1                        | 1123  | P15882    | 2q31-q32.1    | Extraskeletal myxoid chondrosarcoma                                                    | -                                                                        | -                            | M             | Dom | T               | TAF15                |
| CLTC                        | 1213  | Q00610    | 17q11-qter    | ALCL                                                                                   | -                                                                        | -                            | L             | Dom | T               | ALK                  |
| COL1A1                      | 1277  | P02452    | 17q21.31-q22  | Dermatofibrosarcoma protuberans                                                        | -                                                                        | -                            | M             | Dom | T               | PDGFRB               |
| COPEB                       | 1316  | Q99612    | 10p15         | Prostatic, glioma                                                                      | -                                                                        | -                            | E, O          | Rec | Mis, N          | -                    |
| COX6C                       | 1345  | P09669    | 8q22-q23      | Uterine leiomyoma                                                                      | -                                                                        | -                            | M             | Dom | T               | HMG2A                |
| CREBBP                      | 1387  | Q92793    | 16p13.3       | AL, AML                                                                                | -                                                                        | -                            | L             | Dom | T               | MLL, MORF, RUNXBP2   |
| CTNNB1                      | 1499  | P35222    | 3q22-p21.3    | Colorectal, ovarian, hepatoblastoma, others                                            | -                                                                        | -                            | E, M, O       | Dom | H, Mis          | -                    |
| CYLD                        | 1540  | NP_056062 | 16q12-q13     | Cylindroma                                                                             | Cylindroma                                                               | Familial cylindromatosis     | E             | Rec | Mis, N, F, S    | -                    |
| DI0S170                     | 8030  | NP_005427 | 10q21         | Papillary thyroid, CML                                                                 | -                                                                        | -                            | E             | Dom | T               | RET, PDGFRB          |
| DDB2                        | 1643  | Q92466    | 11p12         | -                                                                                      | Skin basal cell, skin squamous cell, melanoma                            | Xeroderma pigmentosum E      | E             | Rec | M, N            | -                    |
| DDIT3                       | 1649  | P35638    | 12q13.1-q13.2 | Liposarcoma                                                                            | -                                                                        | -                            | M             | Dom | T               | FUS                  |

|        |       |           |                |                                                                            |                                               |                             |         |     |                 |                                                                                 |
|--------|-------|-----------|----------------|----------------------------------------------------------------------------|-----------------------------------------------|-----------------------------|---------|-----|-----------------|---------------------------------------------------------------------------------|
| DDX10  | 1662  | Q13206    | 11q22-q23      | AML <sup>s</sup>                                                           | -                                             | -                           | L       | Dom | T               | NUP98                                                                           |
| DEK    | 7913  | P35659    | 6p23           | AML                                                                        | -                                             | -                           | L       | Dom | T               | NUP214                                                                          |
| EGFR   | 1956  | P00533    | 7p12.3-p12.1   | Glioma                                                                     | -                                             | -                           | O       | Dom | A, O, I         | -                                                                               |
| EIF4A2 | 1974  | Q14240    | 3q27.3         | NHL                                                                        | -                                             | -                           | L       | Dom | T               | BCL6                                                                            |
| ELKS   | 23085 | NP_055879 | 12p13.3        | Papillary thyroid                                                          | -                                             | -                           | E       | Dom | T               | RET                                                                             |
| ELL    | 8178  | P55199    | 19p13.1        | AL                                                                         | -                                             | -                           | L       | Dom | T               | MLL                                                                             |
| EP300  | 2033  | Q09472    | 22q13          | Colorectal, breast, pancreatic, AML                                        | -                                             | -                           | L, E    | Rec | T               | MLL, RUNXBP2                                                                    |
| EP315  | 2060  | P42566    | 1p32           | ALL                                                                        | -                                             | -                           | L       | Dom | T               | MLL                                                                             |
| ERBB2  | 2064  | P04626    | 17q21.1        | Breast, ovarian, other tumour types                                        | -                                             | -                           | E       | Dom | A               | -                                                                               |
| ERCC2  | 2068  | P18074    | 19q13.2-q13.3  | -                                                                          | Skin basal cell, skin squamous cell, melanoma | Xeroderma pigmentosum D     | E       | Rec | M, N, F, S      | -                                                                               |
| ERCC3  | 2071  | P19447    | 2q21           | -                                                                          | Skin basal cell, skin squamous cell, melanoma | Xeroderma pigmentosum B     | E       | Rec | M, S            | -                                                                               |
| ERCC4  | 2072  | Q92889    | 16p13.3-p13.13 | -                                                                          | Skin basal cell, skin squamous cell, melanoma | Xeroderma pigmentosum F     | E       | Rec | M, N, F         | -                                                                               |
| ERCC5  | 2073  | P28715    | 13q33          | -                                                                          | Skin basal cell, skin squamous cell, melanoma | Xeroderma pigmentosum G     | E       | Rec | M, N, F         | -                                                                               |
| ERG    | 2078  | P11308    | 21q22.3        | Ewing's sarcoma                                                            | -                                             | -                           | M       | Dom | T               | EWSR1                                                                           |
| ETV1   | 2115  | P50549    | 7p22           | Ewing's sarcoma                                                            | -                                             | -                           | M       | Dom | T               | EWSR1                                                                           |
| ETV4   | 2118  | P43268    | 17q21          | Ewing's sarcoma                                                            | -                                             | -                           | M       | Dom | T               | EWSR1                                                                           |
| ETV6   | 2120  | P41212    | 12p13          | Congenital fibrosarcoma, multiple leukaemia and lymphoma, secretory breast | -                                             | -                           | L, E, M | Dom | T               | NTRK3, RUNX1, PDGFRB, ABL1, MN1, ABL2, FACL6, CHC2, ARNT, JAK2, ETV1, CDX2, STL |
| EVI1   | 2122  | Q03112    | 3q26           | AML, CML                                                                   | -                                             | -                           | L       | Dom | T               | RUNX1, ETV6                                                                     |
| EWSR1  | 2130  | NP_005234 | 22q12          | Ewing's sarcoma, desmoplastic small round cell, ALL                        | -                                             | -                           | L, M    | Dom | T               | FLI1, ERG, ZNF278, NR4A3, TEC, FEV, ATF1, ETV1, ETV4, WT1, ZNF384               |
| EXT1   | 2131  | NP_000118 | 8q24.11-q24.13 | -                                                                          | Exostoses, osteosarcoma                       | Multiple exostoses type 1 M | M       | Rec | Mis, N, F, S    | -                                                                               |
| EXT2   | 2132  | Q93063    | 11p12-p11      | -                                                                          | Exostoses, osteosarcoma                       | Multiple exostoses type 2 M | M       | Rec | Mis, N, F, S    | -                                                                               |
| FACL6  | 23305 | NP_056071 | 5q31           | AML, AEL                                                                   | -                                             | -                           | L       | Dom | T               | ETV6                                                                            |
| FANCA  | 2175  | NP_000126 | 16q24.3        | -                                                                          | AML, leukaemia                                | Fanconi anaemia A           | L       | Rec | D, Mis, N, F, S | -                                                                               |
| FANCC  | 2176  | Q00597    | 9q22.3         | -                                                                          | AML, leukaemia                                | Fanconi anaemia C           | L       | Rec | D, Mis, N, F, S | -                                                                               |
| FANCD2 | 2177  | NP_149075 | 3p26           | -                                                                          | AML, leukaemia                                | Fanconi anaemia D2          | L       | Rec | D, Mis, N, F    | -                                                                               |
| FANCF  | 2178  | NP_068741 | 6p21-p22       | -                                                                          | AML, leukaemia                                | Fanconi anaemia E           | L       | Rec | N, F, S         | -                                                                               |
| FANCG  | 2188  | Q9NPI8    | 11p15          | -                                                                          | AML, leukaemia                                | Fanconi anaemia F           | L       | Rec | N, F            | -                                                                               |
| FEV    | 2189  | O15287    | 9p13           | -                                                                          | AML, leukaemia                                | Fanconi anaemia G           | L       | Rec | Mis, N, F, S    | -                                                                               |
| FGFR1  | 2260  | NP_059991 | 2q36           | Ewing's sarcoma                                                            | -                                             | -                           | M       | Dom | T               | EWSR1                                                                           |
| FGFR1  | 2260  | P11362    | 8p11.2-p11.1   | MPD/NHL                                                                    | -                                             | -                           | L       | Dom | T               | BCR, FOP, ZNF198, CEP1                                                          |

|          |       |           |            |                                             |                                                     |                                                 |      |     |                    |                                  |
|----------|-------|-----------|------------|---------------------------------------------|-----------------------------------------------------|-------------------------------------------------|------|-----|--------------------|----------------------------------|
| FGFR1OP  | 11116 | NP_008976 | 6q27       | M/PD/NHL                                    | -                                                   | -                                               | L    | Dom | T                  | FGFR1                            |
| FGFR2    | 2263  | P21802    | 10q26      | Gastric                                     | -                                                   | -                                               | E    | Dom | Mis                | -                                |
| FGFR3    | 2261  | P22607    | 4p16.3     | Bladder, MM                                 | -                                                   | -                                               | L, E | Dom | Mis, T             | IGHa                             |
| FH       | 2271  | P07954    | 14q2.1     | -                                           | Leiomyomatosis, renal                               | Hereditary leiomyomatosis and renal-cell cancer | E, M | Rec | Mis, N, F          | -                                |
| FIP1L1   | 81608 | NP_112179 | 4q12       | Idiopathic hypereosinophilic syndrome       | -                                                   | -                                               | L    | Dom | T                  | PDGFRA                           |
| FLI1     | 2313  | Q01543    | 11q24      | Ewing's sarcoma                             | -                                                   | -                                               | M    | Dom | T                  | EWSR1                            |
| FLT3     | 2322  | P36888    | 13q12      | AML, ALL                                    | -                                                   | -                                               | L    | Dom | Mis, O             | -                                |
| FLT4     | 2324  | P35916    | 5q35.3     | Angiosarcoma                                | -                                                   | -                                               | M    | Dom | Mis                | -                                |
| FNBP1    | 23048 | XP_052666 | 9q23       | AML                                         | -                                                   | -                                               | L    | Dom | T                  | MLL                              |
| FOXO1A   | 2308  | Q12778    | 13q14.1    | Alveolar rhabdomyosarcomas                  | -                                                   | -                                               | M    | Dom | T                  | PAX3                             |
| FOXO3A   | 2309  | Q43524    | 6q21       | AL                                          | -                                                   | -                                               | L    | Dom | T                  | MLL                              |
| FSTL3    | 10272 | Q95633    | 19p13      | B-CLL                                       | -                                                   | -                                               | L    | Dom | T                  | OCND1                            |
| FLS      | 2521  | P35637    | 16p11.2    | Liposarcoma                                 | -                                                   | -                                               | M    | Dom | T                  | DDIT3                            |
| GAS7     | 8522  | O60861    | 17p        | AML <sup>s</sup>                            | -                                                   | -                                               | L    | Dom | T                  | MLL                              |
| GATA1    | 2623  | P15976    | Xp11.23    | Megakaryoblastic leukaemia of Down syndrome | -                                                   | -                                               | L    | Dom | Mis, F             | -                                |
| GMPS     | 8833  | P49915    | 3q24       | AML                                         | -                                                   | -                                               | L    | Dom | T                  | MLL                              |
| GMAS     | 2778  | P04895    | 20q13.2    | Pituitary adenoma                           | -                                                   | -                                               | E    | Dom | Mis                | -                                |
| GOLGA5   | 9950  | NP_005104 | 14q        | Papillary thyroid                           | -                                                   | -                                               | E    | Dom | T                  | RET                              |
| GPC3     | 2719  | P51654    | Xq26.1     | -                                           | Wilms' tumour                                       | Simpson-Goldi-Behmel syndrome                   | O    | Rec | T, D, Mis, N, F, S | -                                |
| GPHN     | 10243 | Q9NQX3    | 14q24      | AL                                          | -                                                   | -                                               | L    | Dom | T                  | MLL                              |
| GRAF     | 23092 | NP_055886 | 5q31       | AML, MDS                                    | -                                                   | -                                               | L    | Dom | T, F, S            | MLL                              |
| HEI10    | 57820 | NP_067001 | 14q11.1    | Uterine leiomyoma                           | -                                                   | -                                               | M    | Dom | T                  | HMGAR                            |
| HIP1     | 3092  | O00291    | 7q11.23    | CMML                                        | -                                                   | -                                               | L    | Dom | T                  | PDGFRB                           |
| HIST1H4I | 8294  | NP_003486 | 6p21.3     | NHL                                         | -                                                   | -                                               | L    | Dom | T                  | BCL6                             |
| HLF      | 3131  | Q16534    | 17q22      | ALL                                         | -                                                   | -                                               | L    | Dom | T                  | TCF3                             |
| HMGAR    | 8091  | P52926    | 12q15      | Lipoma                                      | -                                                   | -                                               | M    | Dom | T                  | LHFP, RAD51L1, LPP, HEI10, COX6C |
| HOXA11   | 3207  | P31270    | 7p15-p14.2 | CML                                         | -                                                   | -                                               | L    | Dom | T                  | NUP98                            |
| HOXA13   | 3209  | P31271    | 7p15-p14.2 | AML                                         | -                                                   | -                                               | L    | Dom | T                  | NUP98                            |
| HOXA9    | 3205  | P31269    | 7p15-p14.2 | AML <sup>s</sup>                            | -                                                   | -                                               | L    | Dom | T                  | NUP98                            |
| HOXC13   | 3229  | P31276    | 12q13.3    | AML                                         | -                                                   | -                                               | L    | Dom | T                  | NUP98                            |
| HOXD11   | 3237  | P31277    | 2q31-q32   | AML                                         | -                                                   | -                                               | L    | Dom | T                  | NUP98                            |
| HOXD13   | 3239  | P35453    | 2q31-q32   | AML <sup>s</sup>                            | -                                                   | -                                               | L    | Dom | T                  | NUP98                            |
| HRAS     | 3265  | P01112    | 11p15.5    | Infrequent sarcomas, rare other types       | -                                                   | -                                               | L, M | Dom | Mis                | -                                |
| HRR12    | 3279  | NP_013522 | 1q21-q31   | Parathyroid adenoma                         | Parathyroid adenoma, multiple ossifying jaw fibroma | Hyperparathyroidism jaw tumour syndrome         | E, M | Rec | Mis, N, F          | -                                |
| HSPCA    | 3320  | P07900    | 1q21.2-q22 | NHL                                         | -                                                   | -                                               | L    | Dom | T                  | BCL6                             |
| HSPCB    | 3326  | P08238    | 6p12       | NHL                                         | -                                                   | -                                               | L    | Dom | T                  | BCL6                             |

|               |       |                   |               |                                                    |                                                                          |                                                      |            |     |                 |                                                                                                |
|---------------|-------|-------------------|---------------|----------------------------------------------------|--------------------------------------------------------------------------|------------------------------------------------------|------------|-----|-----------------|------------------------------------------------------------------------------------------------|
| <i>IGHα</i>   | 3492  | -                 | 14q32.33      | MM, Burkitt's lymphoma, NHL, CLL, B-ALL, MALT      | -                                                                        | -                                                    | L          | Dom | T               | <i>MYC, FGFR3, PAX5, IRTA1, IRF4, CCND1, BCL9, BCL6, BCL8, BCL2, BCL3, BCL10, BCL11A, LHX4</i> |
| <i>IGKα</i>   | 50802 | -                 | 2p12          | Burkitt's lymphoma                                 | -                                                                        | -                                                    | L          | Dom | T               | <i>MYC</i>                                                                                     |
| <i>IGLα</i>   | 3535  | -                 | 22q11.1-q11.2 | Burkitt's lymphoma                                 | -                                                                        | -                                                    | L          | Dom | T               | <i>BCL9, MYC</i>                                                                               |
| <i>IL21R</i>  | 50615 | <i>Q9HBE5</i>     | 16p11         | NHL                                                | -                                                                        | -                                                    | L          | Dom | T               | <i>BCL6</i>                                                                                    |
| <i>IRF4</i>   | 3662  | <i>Q15306</i>     | 6p25-p23      | MM                                                 | -                                                                        | -                                                    | L          | Dom | T               | <i>IGHα</i>                                                                                    |
| <i>IRTA1</i>  | 83417 | <i>NP_112572</i>  | 1q21          | B-NHL                                              | -                                                                        | -                                                    | L          | Dom | T               | <i>IGHα</i>                                                                                    |
| <i>JAK2</i>   | 3717  | <i>O60674</i>     | 9p24          | ALL, AML                                           | -                                                                        | -                                                    | L          | Dom | T               | <i>ETV6</i>                                                                                    |
| <i>KIT</i>    | 3815  | <i>P10721</i>     | 4q12          | GIST, AML, TGCT                                    | GIST, epithelioma                                                        | Familial gastrointestinal stromal                    | L, M, O    | Dom | Mis, O          | -                                                                                              |
| <i>KRAS2</i>  | 3845  | <i>NP_004976</i>  | 12p12.1       | Pancreatic, colorectal, lung, thyroid, AML, others | -                                                                        | -                                                    | L, E, M, O | Dom | Mis             | -                                                                                              |
| <i>LAF4</i>   | 3899  | <i>P51826</i>     | 2q11.2-q12    | ALL                                                | -                                                                        | -                                                    | L          | Dom | T               | <i>MLL</i>                                                                                     |
| <i>LASP1</i>  | 3927  | <i>Q14847</i>     | 17q11-q21.3   | AML                                                | -                                                                        | -                                                    | L          | Dom | T               | <i>MLL</i>                                                                                     |
| <i>LCK</i>    | 3932  | <i>NP_005347</i>  | 1p35-p34.3    | T-ALL                                              | -                                                                        | -                                                    | L          | Dom | T               | <i>TRBα</i>                                                                                    |
| <i>LCP1</i>   | 3936  | <i>P13796</i>     | 13q14.1-q14.3 | NHL                                                | -                                                                        | -                                                    | L          | Dom | T               | <i>BCL6</i>                                                                                    |
| <i>LCX</i>    | 80312 | <i>XP_167612</i>  | 10q21         | AML                                                | -                                                                        | -                                                    | L          | Dom | T               | <i>MLL</i>                                                                                     |
| <i>LHFP</i>   | 10186 | <i>NP_005771</i>  | 13q12         | Lipoma                                             | -                                                                        | -                                                    | M          | Dom | T               | <i>HMGGA2</i>                                                                                  |
| <i>LMO1</i>   | 4004  | <i>P25800</i>     | 11p15         | T-ALL                                              | -                                                                        | -                                                    | L          | Dom | T               | <i>TRDα</i>                                                                                    |
| <i>LMO2</i>   | 4005  | <i>P25791</i>     | 11p13         | T-ALL                                              | -                                                                        | -                                                    | L          | Dom | T               | <i>TRDα</i>                                                                                    |
| <i>LPP</i>    | 4026  | <i>NP_005569</i>  | 3q28          | Lipoma, leukaemia                                  | -                                                                        | -                                                    | L, M       | Dom | T               | <i>HMGGA2, MLL</i>                                                                             |
| <i>LVL1</i>   | 4066  | <i>P12980</i>     | 19p13.2-p13.1 | T-ALL                                              | -                                                                        | -                                                    | L          | Dom | T               | <i>TRBα</i>                                                                                    |
| <i>MADH4</i>  | 4089  | <i>Q13485</i>     | 18q21.1       | Colorectal, pancreatic, small intestine            | Gastrointestinal polyps                                                  | Juvenile polyposis                                   | E          | Rec | D, Mis, N, F    | -                                                                                              |
| <i>MALT1</i>  | 10892 | <i>Q9UDY8</i>     | 18q21         | MALT                                               | -                                                                        | -                                                    | L          | Dom | T               | <i>BIRC3</i>                                                                                   |
| <i>MAML2</i>  | 84441 | <i>XP_045716</i>  | 11q22-q23     | Salivary-gland mucocpidermoid                      | -                                                                        | -                                                    | E          | Dom | T               | <i>MECT1</i>                                                                                   |
| <i>MAP2K4</i> | 6416  | <i>P45985</i>     | 17p11.2       | Pancreatic, breast, colorectal                     | -                                                                        | -                                                    | E          | Rec | D, Mis, N       | -                                                                                              |
| <i>MDS1</i>   | 4197  | <i>Q13465</i>     | 3q26          | MDS, AML                                           | -                                                                        | -                                                    | L          | Dom | T               | <i>RUNX1</i>                                                                                   |
| <i>MECT1</i>  | 94159 | <i>AAK93832.1</i> | 19p13         | Salivary-gland mucocpidermoid                      | -                                                                        | -                                                    | E          | Dom | T               | <i>MAML2</i>                                                                                   |
| <i>MEN1</i>   | 4221  | <i>O00255</i>     | 11q13         | Parathyroid                                        | Parathyroid adenoma, pituitary adenoma, pancreatic islet cell, carcinoid | Multiple endocrine neoplasia type 1                  | E          | Rec | D, Mis, N, F, S | -                                                                                              |
| <i>MET</i>    | 4233  | <i>P08581</i>     | 7q31          | Papillary renal, head-neck squamous cell           | Papillary renal                                                          | Familial papillary renal                             | E          | Dom | Mis             | -                                                                                              |
| <i>MHC2TA</i> | 4261  | <i>P33076</i>     | 16p13         | NHL                                                | -                                                                        | -                                                    | L          | Dom | T               | <i>BCL6</i>                                                                                    |
| <i>MLF1</i>   | 4291  | <i>P58340</i>     | 3q25.1        | AML                                                | -                                                                        | -                                                    | L          | Dom | T               | <i>NPM1</i>                                                                                    |
| <i>MLH1</i>   | 4292  | <i>P40692</i>     | 3p21.3        | Colorectal, endometrial, ovarian, CNS              | Colorectal, endometrial, ovarian, CNS                                    | Hereditary non-polyposis colorectal, Turcot syndrome | E, O       | Rec | D, Mis, N, F, S | -                                                                                              |
| <i>MLL</i>    | 4297  | <i>O03164</i>     | 11q23         | AML, ALL                                           | -                                                                        | -                                                    | L          | Dom | T, O            | <i>MLL, MLLT1, MLLT2, MLLT3, MLLT4, MLLT7, MLLT10, MLLT6, ELL, EPS15, AF1Q, CREBBP</i>         |

SH3GL1, FNBP1, PNUTL1,  
MSF, GRN, GMPS,  
SSH3BP1, ARHGGEF12,  
GAS7, FOXO3A, LAF4,  
LCX, SEPT6, LPP,  
CBFA2T1, GRAF, EP300,  
PCALM

|        |       |           |                 |                                                       |                                                |                                     |            |     |                    |                                                                |
|--------|-------|-----------|-----------------|-------------------------------------------------------|------------------------------------------------|-------------------------------------|------------|-----|--------------------|----------------------------------------------------------------|
| MLLT1  | 4298  | Q03111    | 19p13.3         | AL                                                    | -                                              | -                                   | L          | Dom | T                  | MIL                                                            |
| MLLT10 | 8028  | P55197    | 10p12           | AL                                                    | -                                              | -                                   | L          | Dom | T                  | MIL, PICALM                                                    |
| MLLT2  | 4299  | P51825    | 4q21            | AL                                                    | -                                              | -                                   | L          | Dom | T                  | MIL                                                            |
| MLLT3  | 4300  | P42568    | 9p22            | ALL                                                   | -                                              | -                                   | L          | Dom | T                  | MIL                                                            |
| MLLT4  | 4301  | P55196    | 6q27            | AL                                                    | -                                              | -                                   | L          | Dom | T                  | MIL                                                            |
| MLLT6  | 4302  | P55198    | 17q21           | AL                                                    | -                                              | -                                   | L          | Dom | T                  | MIL                                                            |
| MLLT7  | 4303  | NP_005929 | Xq13.1          | AL                                                    | -                                              | -                                   | L          | Dom | T                  | MIL                                                            |
| MM1    | 4330  | Q10571    | 22q13           | AML, meningioma                                       | -                                              | -                                   | L, O       | Dom | T                  | ETV6                                                           |
| MSF    | 10801 | NP_006631 | 17q25           | AML <sup>s</sup>                                      | -                                              | -                                   | L          | Dom | T                  | MIL                                                            |
| MSH2   | 4436  | P43246    | 2p22-p21        | Colorectal, endometrial, ovarian                      | Colorectal, endometrial, ovarian               | Hereditary non-polyposis colorectal | E          | Rec | D, Mts, N, F, S    | -                                                              |
| MSH6   | 2956  | P52701    | 2p16            | Colorectal                                            | Colorectal, endometrial, ovarian               | Hereditary non-polyposis colorectal | E          | Rec | Mis, N, F, S       | -                                                              |
| MSN    | 4478  | P26038    | Xq11.2-q12      | ALCL                                                  | -                                              | -                                   | L          | Dom | T                  | ALK                                                            |
| MUTYH  | 4595  | NP_036354 | 1p34.3-1p32.1   | Burkitt's lymphoma, amplified in other cancers, B-CLL | Colorectal                                     | Adenomatous polyposis coli          | E          | Rec | M                  | -                                                              |
| MYC    | 4609  | P01106    | 8q24.12-q24.13  | Burkitt's lymphoma, amplified in other cancers, B-CLL | -                                              | -                                   | L, E       | Dom | A, T               | IGK $\alpha$ , BCL5, BCL7A, BTG1, TRAF $\alpha$ , IGH $\alpha$ |
| MYCL1  | 4610  | P12524    | 1p34.3          | Small cell lung                                       | -                                              | -                                   | E          | Dom | A                  | -                                                              |
| MYCN   | 4613  | P04198    | 2p24.1          | Neuroblastoma                                         | -                                              | -                                   | O          | Dom | A                  | -                                                              |
| MYH11  | 4629  | P35749    | 16p13.13-p13.12 | AML                                                   | -                                              | -                                   | L          | Dom | T                  | CBFB                                                           |
| MYH9   | 4627  | P35579    | 22q13.1         | ALCL                                                  | -                                              | -                                   | L          | Dom | T                  | ALK                                                            |
| MYST4  | 23522 | NP_036462 | 10q22           | AML                                                   | -                                              | -                                   | L          | Dom | T                  | CREBBP                                                         |
| MACA   | 4666  | NP_005585 | 12q23-q24.1     | NHL                                                   | -                                              | -                                   | L          | Dom | T                  | BCL6                                                           |
| NBS1   | 4683  | NP_002476 | 8q21            | -                                                     | NHL, glioma, medulloblastoma, rhabdomyosarcoma | Nijmegen breakage syndrome          | L, E, M, O | Rec | Mis, N, F          | -                                                              |
| NCOA2  | 10499 | Q15596    | 8q13.1          | AML                                                   | -                                              | -                                   | L          | Dom | T                  | RUNXBP2                                                        |
| NCOA4  | 8031  | Q13772    | 10q11.2         | Papillary thyroid                                     | -                                              | -                                   | E          | Dom | T                  | RET                                                            |
| NF1    | 4763  | P21359    | 17q12           | Neurofibroma, glioma                                  | Neurofibroma, glioma                           | Neurofibromatosis type 1            | O          | Rec | D, Mts, N, F, S, O | -                                                              |
| NF2    | 4771  | P35240    | 22q12.2         | Meningioma, acoustic neuroma                          | Meningioma, acoustic neuroma                   | Neurofibromatosis type 2            | O          | Rec | D, Mts, N, F, S, O | -                                                              |
| NOTCH1 | 4851  | P46531    | 9q34.3          | T-ALL                                                 | -                                              | -                                   | L          | Dom | T                  | TRB $\alpha$                                                   |
| NPM1   | 4869  | P06748    | 5q35            | NHL, APL, AML                                         | -                                              | -                                   | L          | Dom | T                  | ALK, RARA, MLLF1                                               |
| NR4A3  | 8013  | Q92570    | 9q22            | Extraskeletal myxoid chondrosarcoma                   | -                                              | -                                   | M          | Dom | T                  | EWSR1                                                          |
| NRAS   | 4893  | P01111    | 1p13.2          | Melanoma, MM, AML, thyroid                            | -                                              | -                                   | L, E       | Dom | Mis                | -                                                              |
| NSD1   | 64324 | NP_071900 | 5q35            | AML                                                   | -                                              | -                                   | L          | Dom | T                  | NUP98                                                          |

|                |        |           |               |                                              |                                                           |                                                             |            |          |                 |                                                                                          |
|----------------|--------|-----------|---------------|----------------------------------------------|-----------------------------------------------------------|-------------------------------------------------------------|------------|----------|-----------------|------------------------------------------------------------------------------------------|
| <i>NTRK1</i>   | 4914   | P04629    | 1q21-q22      | Papillary thyroid                            | -                                                         | -                                                           | E          | Dom      | T               | <i>TPM3, TPR, TFG</i>                                                                    |
| <i>NTRK3</i>   | 4916   | Q16288    | 15q25         | Congenital fibrosarcoma, secretory breast    | -                                                         | -                                                           | E, M       | Dom      | T               | <i>ETV6</i>                                                                              |
| <i>NUMA1</i>   | 4926   | NP_006176 | 11q13         | APL                                          | -                                                         | -                                                           | L          | Dom      | T               | <i>PAPA</i>                                                                              |
| <i>NUP214</i>  | 8021   | P35658    | 9q34.1        | AML                                          | -                                                         | -                                                           | L          | Dom      | T               | <i>DEK, SET</i>                                                                          |
| <i>NUP98</i>   | 4928   | P52948    | 11p15         | AML                                          | -                                                         | -                                                           | L          | Dom      | T               | <i>HOXA9, NSD1, WHSC1L1, DDX10, TOP1, HOXD13, PMX1, HOXA13, HOXD11, HOXA11, RAP1GDS1</i> |
| <i>NUT</i>     | 256646 | XP_171724 | 15q13         | Lethal midline carcinoma of young people     | -                                                         | -                                                           | E          | Dom      | T               | <i>BRD4</i>                                                                              |
| <i>OLIG2</i>   | 10215  | Q13516    | 21q22.11      | T-ALL                                        | -                                                         | -                                                           | L          | Dom      | T               | <i>TRAc</i>                                                                              |
| <i>PAX3</i>    | 5077   | P23760    | 2q35          | Alveolar rhabdomyosarcoma                    | -                                                         | -                                                           | M          | Dom      | T               | <i>FOXO1A</i>                                                                            |
| <i>PAX5</i>    | 5079   | Q02548    | 9p13          | NHL                                          | -                                                         | -                                                           | L          | Dom      | T               | <i>IGHc</i>                                                                              |
| <i>PAX7</i>    | 5081   | P23759    | 1p36.2-p36.12 | Alveolar rhabdomyosarcoma                    | -                                                         | -                                                           | M          | Dom      | T               | <i>FOXO1A</i>                                                                            |
| <i>PAX8</i>    | 7849   | Q06710    | 2q12-q14      | Follicular thyroid                           | -                                                         | -                                                           | E          | Dom      | T               | <i>PAPARG</i>                                                                            |
| <i>PBX1</i>    | 5087   | NP_002576 | 1q23          | Pre-B-ALL                                    | -                                                         | -                                                           | L          | Dom      | T               | <i>TCF3</i>                                                                              |
| <i>PCM1</i>    | 5108   | NP_006188 | 8p22-p21.3    | Papillary thyroid                            | -                                                         | -                                                           | E          | Dom      | T               | <i>RET</i>                                                                               |
| <i>PDGFB</i>   | 5155   | P01127    | 22q12.3-q13.1 | DFSP                                         | -                                                         | -                                                           | M          | Dom      | T               | <i>COL1A1</i>                                                                            |
| <i>PDGFRA</i>  | 5156   | P16234    | 4q11-q13      | GIST                                         | -                                                         | -                                                           | M, O       | Dom      | Mis, O          | -                                                                                        |
| <i>PDGFRB</i>  | 5159   | NP_002600 | 5q31-q32      | MPD, AML, CMML, CML                          | -                                                         | -                                                           | L          | Dom      | T               | <i>ETV6, TRIP11, HIP1, RAB5EP, H4</i>                                                    |
| <i>PICALM</i>  | 8301   | Q13492    | 11q14         | T-ALL, AML                                   | -                                                         | -                                                           | L          | Dom      | T               | <i>MLLT10, MLL</i>                                                                       |
| <i>PLM1</i>    | 5292   | P11309    | 6p21.2        | NHL                                          | -                                                         | -                                                           | L          | Dom      | T               | <i>BCL6</i>                                                                              |
| <i>PML</i>     | 5371   | P29590    | 15q22         | APL                                          | -                                                         | -                                                           | L          | Dom      | T               | <i>RARA</i>                                                                              |
| <i>PMS1</i>    | 5378   | P54277    | 2q31-q33      | -                                            | Colorectal, endometrial, ovarian                          | Hereditary non-polyposis colorectal cancer                  | E          | Rec      | Mis, N          | -                                                                                        |
| <i>PMS2</i>    | 5395   | P54278    | 7p22          | -                                            | Colorectal, endometrial, ovarian, medulloblastoma, glioma | Hereditary non-polyposis colorectal cancer, Turcot syndrome | E          | Rec      | Mis, N, F       | -                                                                                        |
| <i>PMX1</i>    | 5396   | P54821    | 1q24          | AML                                          | -                                                         | -                                                           | L          | Dom      | T               | <i>NUP98</i>                                                                             |
| <i>PNUTL1</i>  | 5413   | NP_002679 | 22q11.2       | AML                                          | -                                                         | -                                                           | L          | Dom      | T               | <i>MLL</i>                                                                               |
| <i>POU2AF1</i> | 5450   | Q16633    | 11q23.1       | NHL                                          | -                                                         | -                                                           | L          | Dom      | T               | <i>BCL6</i>                                                                              |
| <i>PPARG</i>   | 5468   | P37231    | 3p25          | Follicular thyroid                           | -                                                         | -                                                           | E          | Dom      | T               | <i>PAX8</i>                                                                              |
| <i>PRCC</i>    | 5546   | Q92733    | 1q21.1        | Papillary renal                              | -                                                         | -                                                           | E          | Dom      | T               | <i>TFE3</i>                                                                              |
| <i>PRKAR1A</i> | 5573   | P10644    | 17q23-q24     | Papillary thyroid                            | Myxoma, endocrine, papillary thyroid                      | Carney complex                                              | E, M       | Dom, Rec | T, Mis, N, F, S | <i>RET</i>                                                                               |
| <i>PRO1073</i> | 29005  | Q9UH22    | 11q31.1       | Renal-cell carcinoma (childhood epithelioid) | -                                                         | -                                                           | E          | Dom      | T               | <i>TFEB</i>                                                                              |
| <i>PSIP2</i>   | 11168  | NP_150091 | 9p22.2        | AML                                          | -                                                         | -                                                           | L          | Dom      | T               | <i>NUP98</i>                                                                             |
| <i>PTCH</i>    | 5727   | Q13635    | 9q22.3        | Skin basal cell, medulloblastoma             | Skin basal cell, medulloblastoma                          | Nevoid basal-cell carcinoma syndrome                        | E, M       | Rec      | Mis, N, F, S    | -                                                                                        |
| <i>PTEN</i>    | 5728   | Q00633    | 10q23.3       | Glioma, prostatic, endometrial               | Harmatoma, glioma, prostatic, endometrial                 | Cowden syndrome, Bannayan-Riley-Ruvatkaba syndrome          | L, E, M, O | Rec      | D, Mis, N, F, S | -                                                                                        |

|                 |       |            |                |                                                        |                                                        |                                    |            |     |                 |                                                  |
|-----------------|-------|------------|----------------|--------------------------------------------------------|--------------------------------------------------------|------------------------------------|------------|-----|-----------------|--------------------------------------------------|
| <i>PTPN11</i>   | 5781  | Q06124     | 12q24.1        | JMML, AML, MDS                                         | -                                                      | -                                  | L          | Dom | Mis             | -                                                |
| <i>RAB5EP</i>   | 9135  | NP_004694  | 17p13          | CMML                                                   | -                                                      | -                                  | L          | Dom | T               | <i>PDGFRB</i>                                    |
| <i>RAD51L1</i>  | 5890  | NP_002868  | 14q23-q24.2    | Lipoma, uterine leiomyoma                              | -                                                      | -                                  | M          | Dom | T               | <i>HMG2</i>                                      |
| <i>RAP1GDS1</i> | 5910  | P52306     | 4q21-q25       | T-ALL                                                  | -                                                      | -                                  | L          | Dom | T               | <i>NUP98</i>                                     |
| <i>RARA</i>     | 5914  | P10276     | 17q12          | APL                                                    | -                                                      | -                                  | L          | Dom | T               | <i>PML, ZNF145, TFE1, NUMA1, NPM1</i>            |
| <i>RB1</i>      | 5925  | P06400     | 13q14          | Retinoblastoma, sarcoma, breast, small-cell lung       | Retinoblastoma, sarcoma, breast, small-cell lung       | Familial retinoblastoma            | L, E, M, O | Rec | D, Mis, N, F, S | -                                                |
| <i>RECQL4</i>   | 9401  | Q94761     | 8q24.3         | -                                                      | Osteosarcoma, skin basal and squamous cell             | Rothmund-Thompson syndrome         | M          | Rec | N, F, S         | -                                                |
| <i>REL</i>      | 5966  | Q04864     | 2p13-p12       | Hodgkin Lymphoma                                       | -                                                      | -                                  | L          | Dom | A               | -                                                |
| <i>RET</i>      | 5979  | P07949     | 10q11.2        | Medullary thyroid, papillary thyroid, pheochromocytoma | Medullary thyroid, papillary thyroid, pheochromocytoma | Multiple endocrine neoplasia 2A/2B | E, O       | Dom | T, Mis, N, F    | <i>H4, PRKAR1A, NCOA4, PCMT1, GOLGA5, TRIM33</i> |
| <i>RPL22</i>    | 6146  | P35268     | 3q26           | AML, CML                                               | -                                                      | -                                  | L          | Dom | T               | <i>RUNX1</i>                                     |
| <i>RUNX1</i>    | 861   | Q01196     | 21q22.3        | AML, pre-B-ALL                                         | -                                                      | -                                  | L          | Dom | T               | <i>RPL22, MDS1, EVI1, CBF4213, CBF4211, ETV6</i> |
| <i>RUNXBP2</i>  | 799   | NP_006757  | 8p11           | AML                                                    | -                                                      | -                                  | L          | Dom | T               | <i>CREBBP, NCOA2, EP300</i>                      |
| <i>SBD5</i>     | 51119 | Q9Y3A5     | 7q11           | -                                                      | AML, MDS                                               | Schwachman-Diamond syndrome        | L          | Rec | Gene conversion | -                                                |
| <i>SDHB</i>     | 6390  | P21912     | 1p36.1-p35     | -                                                      | Paraganglioma, pheochromocytoma                        | Familial paraganglioma             | O          | Rec | Mis, N, F       | -                                                |
| <i>SDHC</i>     | 6391  | O75609     | 1q21           | -                                                      | Paraganglioma, pheochromocytoma                        | Familial paraganglioma             | O          | Rec | Mis, N, F       | -                                                |
| <i>SDHD</i>     | 6392  | O14521     | 11q23          | -                                                      | Paraganglioma, pheochromocytoma                        | Familial paraganglioma             | O          | Rec | Mis, N, F, S    | -                                                |
| <i>SEPT6</i>    | 23157 | NP_055944  | Xq24           | AML                                                    | -                                                      | -                                  | L          | Dom | T               | <i>MLL</i>                                       |
| <i>SET</i>      | 6418  | Q01105     | 9q34           | AML                                                    | -                                                      | -                                  | L          | Dom | T               | <i>NUP214</i>                                    |
| <i>SFPQ</i>     | 6421  | P23246     | 1p34.3         | Papillary renal cell                                   | -                                                      | -                                  | E          | Dom | T               | <i>TEE3</i>                                      |
| <i>SH3GL1</i>   | 6455  | Q99961     | 19p13.3        | AL                                                     | -                                                      | -                                  | L          | Dom | T               | <i>MLL</i>                                       |
| <i>SMARCB1</i>  | 6598  | Q12824     | 22q11          | Malignant rhabdoid                                     | Malignant rhabdoid                                     | Rhabdoid predisposition syndrome   | M          | Rec | D, N, F, S      | -                                                |
| <i>SMO</i>      | 6608  | Q99835     | 7q31-q32       | Skin basal cell                                        | -                                                      | -                                  | E          | Dom | Mis             | -                                                |
| <i>SS18</i>     | 6760  | Q15532     | 18q11.2        | Synovial sarcoma                                       | -                                                      | -                                  | M          | Dom | T               | <i>SSX1, SSX2</i>                                |
| <i>SS18L1</i>   | 26039 | O75177     | 20q13.3        | Synovial sarcoma                                       | -                                                      | -                                  | M          | Dom | T               | <i>SSX1</i>                                      |
| <i>SSH3BP1</i>  | 10006 | NP_005461  | 10p11.2        | AML                                                    | -                                                      | -                                  | L          | Dom | T               | <i>MLL</i>                                       |
| <i>SSX1</i>     | 6756  | Q16384     | Xp11.23-p11.22 | Synovial sarcoma                                       | -                                                      | -                                  | M          | Dom | T               | <i>SS18</i>                                      |
| <i>SSX2</i>     | 6757  | Q16385     | Xp11.23-p11.22 | Synovial sarcoma                                       | -                                                      | -                                  | M          | Dom | T               | <i>SS18</i>                                      |
| <i>SSX4</i>     | 6759  | O60224     | Xp11.23        | Synovial sarcoma                                       | -                                                      | -                                  | M          | Dom | T               | <i>SS18</i>                                      |
| <i>STK11</i>    | 6794  | Q15831     | 19p13.3        | NSCLC                                                  | Jejunal hamartoma, ovarian, testicular, pancreatic     | Peutz-Jeghers syndrome             | E, M, O    | Rec | D, Mis, N, F, S | -                                                |
| <i>STL</i>      | 7955  | NO PROTEIN | 6q23           | B-ALL                                                  | -                                                      | -                                  | L          | Dom | T               | <i>ETV6</i>                                      |
| <i>SUFU</i>     | 51684 | NP_057253  | 10q24.32       | Medulloblastoma                                        | Medulloblastoma                                        | Medulloblastoma predisposition     | O          | Rec | D, F, S         | -                                                |
| <i>TAF15</i>    | 8148  | Q92804     | 17q11.1-q11.2  | Extraskeletal myxoid chondrosarcoma, ALL               | -                                                      | -                                  | L, M       | Dom | T               | <i>TEC, CHN1, ZNF384</i>                         |



|         |       |           |             |                                                                                          |                                                                                  |                               |               |     |                    |                                   |
|---------|-------|-----------|-------------|------------------------------------------------------------------------------------------|----------------------------------------------------------------------------------|-------------------------------|---------------|-----|--------------------|-----------------------------------|
| TAL1    | 6886  | P17542    | 1p32        | Lymphoblastic leukaemia/<br>biphasic                                                     | -                                                                                | -                             | L             | Dom | T                  | TRDα                              |
| TAL2    | 6887  | Q16559    | 9q31        | T-ALL                                                                                    | -                                                                                | -                             | L             | Dom | T                  | TRBα                              |
| TCF1    | 6927  | P20823    | 12q24.2     | Hepatic adenoma,<br>hepatocellular carcinoma                                             | Hepatic adenoma,<br>hepatocellular carcinoma                                     | Familial hepatic<br>adenoma   | E             | Rec | Mis, F             | -                                 |
| TCF12   | 6938  | Q99081    | 15q21       | Extraskeletal myxoid<br>chondrosarcoma                                                   | -                                                                                | -                             | M             | Dom | T                  | TEC                               |
| TCF3    | 6929  | P15923    | 19p13.3     | pre-B-ALL                                                                                | -                                                                                | -                             | L             | Dom | T                  | PBX1, HLF, TPPT                   |
| TCL1A   | 8115  | NP_068801 | 14q32.1     | T-CLL                                                                                    | -                                                                                | -                             | L             | Dom | T                  | TRAα                              |
| TEC     | 7006  | P42680    | 4p12        | Extraskeletal myxoid<br>chondrosarcoma                                                   | -                                                                                | -                             | M             | Dom | T                  | EWSR1, TAF15, TCF12               |
| TEE3    | 7030  | P19532    | Xp11.22     | Papillary renal, alveolar<br>soft part sarcoma                                           | -                                                                                | -                             | E             | Dom | T                  | SFPQ, ASPSCR1, PRCC               |
| TEEB    | 7942  | P19484    | 6p21        | Renal (childhood epithelioid)                                                            | -                                                                                | -                             | E, M          | Dom | T                  | ALPHA                             |
| TFG     | 10342 | NP_006061 | 3q11-q12    | Papillary thyroid, ALCL                                                                  | -                                                                                | -                             | E, L          | Dom | T                  | NTRK1, ALK                        |
| TFPT    | 29844 | NP_037474 | 19q13       | Pre-B-ALL                                                                                | -                                                                                | -                             | L             | Dom | T                  | TCF3                              |
| TFRC    | 7037  | P02786    | 3q29        | NHL                                                                                      | -                                                                                | -                             | L             | Dom | T                  | BCL6                              |
| TFI1    | 8805  | O15164    | 7q32-q34    | APL                                                                                      | -                                                                                | -                             | L             | Dom | T                  | RARA                              |
| TLX1    | 3195  | P31314    | 10q24       | T-ALL                                                                                    | -                                                                                | -                             | L             | Dom | T                  | TRBα, TRDα                        |
| TLX3    | 30012 | Q43711    | 5q35.1      | T-ALL                                                                                    | -                                                                                | -                             | L             | Dom | T                  | BCL11B                            |
| TNFRSF6 | 355   | P25445    | 10q24.1     | TGCT, nasal NK/T lymphoma,<br>skin squamous-cell carcinoma<br>(burn-scar related)        | -                                                                                | -                             | L, E, O       | Rec | Mis                | -                                 |
| TOP1    | 7150  | P11387    | 20q12-q13.1 | AML <sup>s</sup>                                                                         | -                                                                                | -                             | L             | Dom | T                  | NUP98                             |
| TP53    | 7157  | P04637    | 17p13       | Breast, colorectal, lung,<br>sarcoma, adrenocortical,<br>glioma, multiple other<br>types | Breast, sarcoma,<br>adrenocortical carcinoma,<br>glioma, multiple other<br>types | Li-Fraumeni syndrome          | L, E, M,<br>O | Rec | Mis, N, F          | -                                 |
| TPM3    | 7170  | P06753    | 1q22-q23    | Papillary thyroid, ALCL                                                                  | -                                                                                | -                             | E, L          | Dom | T                  | NTRK1, ALK                        |
| TPM4    | 7171  | P07226    | 19p13.1     | ALCL                                                                                     | -                                                                                | -                             | L             | Dom | T                  | ALK                               |
| TPR     | 7175  | P12270    | 1q25        | Papillary thyroid                                                                        | -                                                                                | -                             | E             | Dom | T                  | NTRK1                             |
| TPAα    | 6955  | -         | 14q11.2     | T-ALL                                                                                    | -                                                                                | -                             | L             | Dom | T                  | ATL, OLG2, MYC, TCL1A             |
| TRBα    | 6957  | -         | 7q35        | T-ALL                                                                                    | -                                                                                | -                             | L             | Dom | T                  | HOX11, LCK, NOTCH1,<br>TAL2, LYL1 |
| TRDα    | 6964  | -         | 14q11       | T-cell leukaemia                                                                         | -                                                                                | -                             | L             | Dom | T                  | TAL1, HOX11, TLX1,<br>LMO1, LMO2  |
| TRIM33  | 51592 | Q9UPN9    | 1p13        | Papillary thyroid                                                                        | -                                                                                | -                             | E             | Dom | T                  | RET                               |
| TRIP11  | 9321  | NP_004230 | 14q31-q32   | AML                                                                                      | -                                                                                | -                             | L             | Dom | T                  | PDGFRB                            |
| TSC1    | 7248  | Q92574    | 9q34        | -                                                                                        | Hamartoma, renal cell                                                            | Tuberous sclerosis 1          | E, O          | Rec | D, Mis, N,<br>F, S | -                                 |
| TSC2    | 7249  | P49815    | 16p13.3     | -                                                                                        | Hamartoma, renal cell                                                            | Tuberous sclerosis 2          | E, O          | Rec | D, Mis, N,<br>F, S | -                                 |
| TSHR    | 7253  | P16473    | 14q31       | Toxic thyroid adenoma                                                                    | Thyroid adenoma                                                                  | -                             | E             | Dom | Mis                | -                                 |
| VHL     | 7428  | P40337    | 3p25        | Renal, hemangioma,<br>pheochromocytoma                                                   | Renal, hemangioma,<br>pheochromocytoma                                           | von Hippel-Lindau<br>syndrome | E, M, O       | Rec | D, Mis, N,<br>F, S | -                                 |

|         |        |           |                |                                       |                                               |                                                               |            |     |                 |              |
|---------|--------|-----------|----------------|---------------------------------------|-----------------------------------------------|---------------------------------------------------------------|------------|-----|-----------------|--------------|
| WAS     | 7454   | P42768    | Xp11.23-p11.22 | -                                     | Lymphoma                                      | Wiskott-Aldrich syndrome                                      | L          | Rec | Mis, N, F, S    | -            |
| WHSC1L1 | 54904  | NP_060248 | 8p12           | AML                                   | -                                             | -                                                             | L          | Dom | T               | NUP98        |
| WRN     | 7486   | Q14191    | 8p12-p11.2     | -                                     | Osteosarcoma, meningioma, others              | Werner syndrome                                               | L, E, M, O | Rec | Mis, N, F, S    | -            |
| WT1     | 7490   | NP_000369 | 11p13          | Wilms', desmoplastic small round cell | Wilms'                                        | Denys-Drash syndrome, Fraser syndrome, Familial Wilms' tumour | O          | Rec | D, Mis, N, F, S | EMSR1        |
| XPA     | 7507   | P23025    | 9q22.3         | -                                     | Skin basal cell, skin squamous cell, melanoma | Xeroderma pigmentosum A                                       | E          | Rec | Mis, N, F, S    | -            |
| XPC     | 7508   | Q01831    | 3p25           | -                                     | Skin basal cell, skin squamous cell, melanoma | Xeroderma pigmentosum C                                       | E          | Rec | Mis, N, F, S    | -            |
| ZNF145  | 7704   | Q05516    | 11q23.1        | APL                                   | -                                             | -                                                             | L          | Dom | T               | RARA         |
| ZNF198  | 7750   | G9UBW7    | 13q11-q12      | MPPD/NHL                              | -                                             | -                                                             | L          | Dom | T               | FGFR1        |
| ZNF278  | 23598  | NP_055138 | 22q12-q14      | Ewing's sarcoma                       | -                                             | -                                                             | M          | Dom | T               | EMSR1        |
| ZNF384  | 171017 | NP_597733 | 12p13          | ALL                                   | -                                             | -                                                             | L          | Dom | T               | EMSR1, TAF15 |
| ZNFN1A1 | 10320  | NP_006051 | 7p12           | ALL, DLBCL                            | -                                             | -                                                             | L          | Dom | T               | BCL6         |

\*From Swiss-Prot/Refseq. †D (large deletion) covers the abnormalities that result in allele loss/loss of heterozygosity at many recessive cancer genes. †Refers to cases of acute myeloid leukaemia that are associated with treatment. †O (other) in the 'mutation type' column refers primarily to small in-frame deletions/insertions, as found in *KIT/PTGFR*, and larger duplications/insertions, as found in *FLT3* and *EGFR*. Note that where an inversion/large deletion has been shown to result in a fusion protein, these have been listed under translocations. The Wellcome Trust Sanger Institute web version of the cancer-gene set can be found at <http://www.sanger.ac.uk/genetics/CPG/Census/>. A, amplification; AL, acute eosinophilic leukaemia; AL, acute leukaemia; ALL, acute lymphocytic leukaemia; APL, acute promyelocytic leukaemia; B-ALL, B-cell acute lymphocytic leukaemia; B-CLL, B-cell lymphocytic leukaemia; B-NHL, B-cell non-Hodgkin's lymphoma; CLL, chronic lymphatic leukaemia; CML, chronic myeloid leukaemia; CMM, chronic myelomonocytic leukaemia; CNS, central nervous system; D, large deletion; DFSF, dermatofibrosarcoma protuberans; DLBCL, diffuse large B-cell lymphoma; Dom, dominant; E, epithelial; F, frameshift; GIST, gastrointestinal stromal tumour; JMML, juvenile myelomonocytic leukaemia; L, leukaemia/lymphoma; M, mesenchymal; MALT, mucosa-associated lymphoid tissue; MDS, myelodysplastic syndrome; MM, multiple myeloma; Mis, missense; N, nonsense; NHL, non-Hodgkin's lymphoma; NK/T, natural killer T cell; NSCLC, non-small-cell lung cancer; O, other; pre-B-ALL, pre-B-cell acute lymphoblastic leukaemia; Rec, recessive; S, splice site; T, translocation; T-ALL, T-cell acute lymphoblastic leukaemia; T-CLL, T-cell chronic lymphocytic leukaemia; TGCT, testicular germ-cell tumour; T-PLL, T-cell prolymphocytic leukaemia.
