# Supplementary material for: A census of human cancer genes
Source: Springer Nature journal article supplement (doi:10.1038/nrc1299), 2004-03-01
Supplement: 41568_2004_BFnrc1299_MOESM2_ESM.pdf [file 41568_2004_BFnrc1299_MOESM2_ESM.pdf]

Supplementary information S2 | **Number of proteins in the cancer set with Pfam domains**

| <b>Pfam domain</b> | <b>Number of cancer proteins with domain</b> | <b>Number of human proteins with domain</b> | <b>Expected number of proteins with domain in a randomly chosen sample of human proteins</b> | <b>Significant (at 5%)</b> |
|--------------------|----------------------------------------------|---------------------------------------------|----------------------------------------------------------------------------------------------|----------------------------|
| Pkinase            | 27                                           | 643                                         | 6.3                                                                                          | S                          |
| HLH                | 12                                           | 123                                         | 1.2                                                                                          | S                          |
| Homeobox           | 13                                           | 231                                         | 2.3                                                                                          | S                          |
| Ets                | 6                                            | 38                                          | 0.4                                                                                          | S                          |
| PAX                | 4                                            | 11                                          | 0.1                                                                                          | S                          |
| PHD                | 8                                            | 100                                         | 1.0                                                                                          | S                          |
| DNA_mis_repair     | 3                                            | 4                                           | 0.0                                                                                          | S                          |
| HATPase_c          | 5                                            | 28                                          | 0.3                                                                                          | S                          |
| Myc_N_term         | 3                                            | 5                                           | 0.0                                                                                          | S                          |
| AF-4               | 3                                            | 7                                           | 0.1                                                                                          | S                          |
| Bromodomain        | 5                                            | 49                                          | 0.5                                                                                          | S                          |
| DUF902             | 2                                            | 2                                           | 0.0                                                                                          | NS                         |
| KIX                | 2                                            | 2                                           | 0.0                                                                                          | NS                         |
| SH2                | 7                                            | 129                                         | 1.3                                                                                          | NS                         |
| PWWP               | 4                                            | 33                                          | 0.3                                                                                          | NS                         |
| DUF906             | 2                                            | 3                                           | 0.0                                                                                          | NS                         |
| HRDC               | 2                                            | 3                                           | 0.0                                                                                          | NS                         |
| zf-TAZ             | 2                                            | 3                                           | 0.0                                                                                          | NS                         |
| ETS_PEA3_N         | 2                                            | 3                                           | 0.0                                                                                          | NS                         |
| SAM_PNT            | 3                                            | 17                                          | 0.2                                                                                          | NS                         |
| MutS_I             | 2                                            | 4                                           | 0.0                                                                                          | NS                         |
| Exostosin          | 2                                            | 4                                           | 0.0                                                                                          | NS                         |
| SSXT               | 2                                            | 5                                           | 0.0                                                                                          | NS                         |
| Nucleoporin_FG     | 2                                            | 5                                           | 0.0                                                                                          | NS                         |
| MutS_II            | 2                                            | 5                                           | 0.0                                                                                          | NS                         |
| SH3                | 9                                            | 262                                         | 2.6                                                                                          | NS                         |
| GTP_CDC            | 3                                            | 22                                          | 0.2                                                                                          | NS                         |
| DEAD               | 5                                            | 83                                          | 0.8                                                                                          | NS                         |
| ERM                | 2                                            | 6                                           | 0.1                                                                                          | NS                         |
| YEATS              | 2                                            | 6                                           | 0.1                                                                                          | NS                         |
| HSP90              | 2                                            | 7                                           | 0.1                                                                                          | NS                         |
| MutS_IV            | 2                                            | 7                                           | 0.1                                                                                          | NS                         |
| AT_hook            | 3                                            | 26                                          | 0.3                                                                                          | NS                         |
| Helicase_C         | 6                                            | 137                                         | 1.3                                                                                          | NS                         |
| MutS_III           | 2                                            | 8                                           | 0.1                                                                                          | NS                         |
| Recep_L_domain     | 2                                            | 8                                           | 0.1                                                                                          | NS                         |
| Furin-like         | 2                                            | 8                                           | 0.1                                                                                          | NS                         |
| zf-RanBP           | 3                                            | 29                                          | 0.3                                                                                          | NS                         |
| 7tm_1              | 1                                            | 800                                         | 7.8                                                                                          | S                          |
| MOZ_SAS            | 2                                            | 9                                           | 0.1                                                                                          | NS                         |
| Tropomyosin        | 2                                            | 9                                           | 0.1                                                                                          | NS                         |
| MutS_V             | 2                                            | 11                                          | 0.1                                                                                          | NS                         |
| ENTH               | 2                                            | 13                                          | 0.1                                                                                          | NS                         |
| Myosin_N           | 2                                            | 13                                          | 0.1                                                                                          | NS                         |
| Armadillo_seg      | 3                                            | 42                                          | 0.4                                                                                          | NS                         |
| COX6C              | 1                                            | 1                                           | 0.0                                                                                          | NS                         |
| AICARFT_IMPCHas    | 1                                            | 1                                           | 0.0                                                                                          | NS                         |
| Ribosomal_L22e     | 1                                            | 1                                           | 0.0                                                                                          | NS                         |
| Tuberin            | 1                                            | 1                                           | 0.0                                                                                          | NS                         |
| Fanconia           | 1                                            | 1                                           | 0.0                                                                                          | NS                         |
| APC_15aa           | 1                                            | 1                                           | 0.0                                                                                          | NS                         |
| GMP_synt_C         | 1                                            | 1                                           | 0.0                                                                                          | NS                         |

|                 |   |    |     |    |
|-----------------|---|----|-----|----|
| CybS            | 1 | 1  | 0.0 | NS |
| Hamartin        | 1 | 1  | 0.0 | NS |
| EB1_binding     | 1 | 1  | 0.0 | NS |
| XPA_N           | 1 | 1  | 0.0 | NS |
| Cdc73           | 1 | 1  | 0.0 | NS |
| WT1             | 1 | 1  | 0.0 | NS |
| HNF-1A_C        | 1 | 1  | 0.0 | NS |
| VHL             | 1 | 1  | 0.0 | NS |
| Myc-LZ          | 1 | 1  | 0.0 | NS |
| UPF0023         | 1 | 1  | 0.0 | NS |
| BRCA2           | 1 | 1  | 0.0 | NS |
| XPA_C           | 1 | 1  | 0.0 | NS |
| Fanconi         | 1 | 1  | 0.0 | NS |
| Fork_head       | 3 | 49 | 0.5 | NS |
| LIM             | 4 | 92 | 0.9 | NS |
| Myosin_tail     | 2 | 19 | 0.2 | NS |
| CARD            | 2 | 21 | 0.2 | NS |
| Menin           | 1 | 2  | 0.0 | NS |
| CBF_beta        | 1 | 2  | 0.0 | NS |
| APC_basic       | 1 | 2  | 0.0 | NS |
| HNF-1B_C        | 1 | 2  | 0.0 | NS |
| Topoisomerase_I | 1 | 2  | 0.0 | NS |
| Topoisomer_I_N  | 1 | 2  | 0.0 | NS |
| PDGF_N          | 1 | 2  | 0.0 | NS |
| Nucleoplasmin   | 1 | 2  | 0.0 | NS |
| SUFU            | 1 | 2  | 0.0 | NS |
| MoeA_N          | 1 | 2  | 0.0 | NS |
| SNF5            | 1 | 2  | 0.0 | NS |
| Fip1            | 1 | 2  | 0.0 | NS |
| MoeA_C          | 1 | 2  | 0.0 | NS |
| Clathrin_propel | 1 | 2  | 0.0 | NS |
| Sdh_cyt         | 1 | 2  | 0.0 | NS |
| Rad4            | 1 | 2  | 0.0 | NS |
| zf-MYND         | 2 | 24 | 0.2 | NS |
| hormone_rec     | 3 | 62 | 0.6 | NS |
| zf-C4           | 3 | 63 | 0.6 | NS |
| ZZ              | 2 | 25 | 0.2 | NS |
| SAMP            | 1 | 3  | 0.0 | NS |
| TCL1_MTCP1      | 1 | 3  | 0.0 | NS |
| RB_A            | 1 | 3  | 0.0 | NS |
| Caudal_act      | 1 | 3  | 0.0 | NS |
| RB_B            | 1 | 3  | 0.0 | NS |
| Rabaptin        | 1 | 3  | 0.0 | NS |
| Nucleoporin2    | 1 | 3  | 0.0 | NS |
| Runt            | 1 | 3  | 0.0 | NS |
| MGS             | 1 | 3  | 0.0 | NS |
| APC_crr         | 1 | 3  | 0.0 | NS |
| BH4             | 1 | 3  | 0.0 | NS |
| ERCC4           | 1 | 3  | 0.0 | NS |
| YLP             | 1 | 3  | 0.0 | NS |
| FHA             | 2 | 27 | 0.3 | NS |
| Cbl_N2          | 1 | 4  | 0.0 | NS |
| Cbl_N3          | 1 | 4  | 0.0 | NS |
| lyase_1         | 1 | 4  | 0.0 | NS |
| Cbl_N           | 1 | 4  | 0.0 | NS |

|                 |   |     |     |    |
|-----------------|---|-----|-----|----|
| HNF-1_N         | 1 | 4   | 0.0 | NS |
| Band_41         | 2 | 33  | 0.3 | NS |
| XPG_I           | 1 | 5   | 0.0 | NS |
| Hox9_act        | 1 | 5   | 0.0 | NS |
| P53             | 1 | 5   | 0.0 | NS |
| TIG             | 2 | 37  | 0.4 | NS |
| RhoGAP          | 3 | 85  | 0.8 | NS |
| death           | 2 | 39  | 0.4 | NS |
| FYRN            | 1 | 6   | 0.1 | NS |
| MoCF_biosynth   | 1 | 6   | 0.1 | NS |
| FYRC            | 1 | 6   | 0.1 | NS |
| HhH-GPD         | 1 | 6   | 0.1 | NS |
| pKID            | 1 | 6   | 0.1 | NS |
| I_LWEQ          | 1 | 6   | 0.1 | NS |
| Glypican        | 1 | 6   | 0.1 | NS |
| notch           | 1 | 6   | 0.1 | NS |
| GATase          | 1 | 6   | 0.1 | NS |
| PBX             | 1 | 6   | 0.1 | NS |
| TFR_dimer       | 1 | 6   | 0.1 | NS |
| BCL_N           | 1 | 6   | 0.1 | NS |
| PAS             | 2 | 40  | 0.4 | NS |
| zf-B_box        | 3 | 93  | 0.9 | NS |
| fer2            | 1 | 7   | 0.1 | NS |
| XPG_N           | 1 | 7   | 0.1 | NS |
| Patched         | 1 | 7   | 0.1 | NS |
| RBD             | 1 | 7   | 0.1 | NS |
| FAT             | 1 | 7   | 0.1 | NS |
| Clathrin        | 1 | 7   | 0.1 | NS |
| ras             | 4 | 155 | 1.5 | NS |
| 3_5_exonuclease | 1 | 8   | 0.1 | NS |
| DIL             | 1 | 8   | 0.1 | NS |
| MH2             | 1 | 8   | 0.1 | NS |
| BTK             | 1 | 8   | 0.1 | NS |
| Anti_proliferat | 1 | 8   | 0.1 | NS |
| myosin_head     | 2 | 48  | 0.5 | NS |
| NAC             | 1 | 9   | 0.1 | NS |
| HHH             | 1 | 9   | 0.1 | NS |
| FATC            | 1 | 9   | 0.1 | NS |
| Peptidase_M28   | 1 | 9   | 0.1 | NS |
| WH1             | 1 | 9   | 0.1 | NS |
| Nebulin         | 1 | 9   | 0.1 | NS |
| UBA             | 2 | 51  | 0.5 | NS |
| SET             | 2 | 52  | 0.5 | NS |
| IRF             | 1 | 10  | 0.1 | NS |
| PDGF            | 1 | 10  | 0.1 | NS |
| Rlla            | 1 | 11  | 0.1 | NS |
| BIR             | 1 | 11  | 0.1 | NS |
| RHD             | 1 | 11  | 0.1 | NS |
| Activin_recp    | 1 | 12  | 0.1 | NS |
| zf-C3HC4        | 5 | 262 | 2.6 | NS |
| cyclin_C        | 1 | 13  | 0.1 | NS |
| Frizzled        | 1 | 14  | 0.1 | NS |
| OAR             | 1 | 14  | 0.1 | NS |
| MH1             | 1 | 14  | 0.1 | NS |
| Peptidase_C14   | 1 | 14  | 0.1 | NS |

|                 |    |     |     |    |
|-----------------|----|-----|-----|----|
| Rap_GAP         | 1  | 14  | 0.1 | NS |
| CAP_GLY         | 1  | 14  | 0.1 | NS |
| ig              | 11 | 763 | 7.5 | NS |
| RasGAP          | 1  | 15  | 0.1 | NS |
| NAP             | 1  | 15  | 0.1 | NS |
| GATA            | 1  | 15  | 0.1 | NS |
| WD40            | 1  | 344 | 3.4 | NS |
| COLFI           | 1  | 17  | 0.2 | NS |
| DAG_PE-bind     | 2  | 72  | 0.7 | NS |
| zf-CXXC         | 1  | 18  | 0.2 | NS |
| BTB             | 3  | 146 | 1.4 | NS |
| Bcl-2           | 1  | 20  | 0.2 | NS |
| PB1             | 1  | 20  | 0.2 | NS |
| UBX             | 1  | 20  | 0.2 | NS |
| MAM             | 1  | 20  | 0.2 | NS |
| NACHT           | 1  | 20  | 0.2 | NS |
| WH2             | 1  | 22  | 0.2 | NS |
| PA              | 1  | 22  | 0.2 | NS |
| RhoGEF          | 2  | 84  | 0.8 | NS |
| FCH             | 1  | 23  | 0.2 | NS |
| LRRCT           | 2  | 87  | 0.9 | NS |
| NUDIX           | 1  | 24  | 0.2 | NS |
| Cadherin_C_term | 1  | 24  | 0.2 | NS |
| TNFR_c6         | 1  | 25  | 0.2 | NS |
| PBD             | 1  | 25  | 0.2 | NS |
| LRR             | 4  | 244 | 2.4 | NS |
| PSI             | 1  | 26  | 0.3 | NS |
| PI3_PI4_kinase  | 1  | 26  | 0.3 | NS |
| G-alpha         | 1  | 27  | 0.3 | NS |
| BRCT            | 1  | 27  | 0.3 | NS |
| Fz              | 1  | 28  | 0.3 | NS |
| SAP             | 1  | 29  | 0.3 | NS |
| IQ              | 2  | 110 | 1.1 | NS |
| cyclin          | 1  | 37  | 0.4 | NS |
| cNMP_binding    | 1  | 37  | 0.4 | NS |
| AMP-binding     | 1  | 38  | 0.4 | NS |
| rrm             | 4  | 290 | 2.8 | NS |
| kazal           | 1  | 39  | 0.4 | NS |
| Sema            | 1  | 40  | 0.4 | NS |
| zf-C2H2         | 10 | 871 | 8.5 | NS |
| RA              | 1  | 44  | 0.4 | NS |
| pkinase_C       | 1  | 45  | 0.4 | NS |
| EGF             | 1  | 219 | 2.1 | NS |
| histone         | 1  | 49  | 0.5 | NS |
| bZIP            | 1  | 51  | 0.5 | NS |
| LRRNT           | 1  | 56  | 0.5 | NS |
| Y_phosphatase   | 1  | 59  | 0.6 | NS |
| cadherin        | 2  | 162 | 1.6 | NS |
| ank             | 3  | 266 | 2.6 | NS |
| HMG_box         | 1  | 68  | 0.7 | NS |
| WW              | 1  | 72  | 0.7 | NS |
| UCH             | 1  | 72  | 0.7 | NS |
| CH              | 1  | 78  | 0.8 | NS |
| PDZ             | 2  | 186 | 1.8 | NS |
| PH              | 3  | 303 | 3.0 | NS |

|                     |            |              |     |    |
|---------------------|------------|--------------|-----|----|
| C2                  | 1          | 146          | 1.4 | NS |
| Collagen            | 1          | 90           | 0.9 | NS |
| efhand              | 2          | 233          | 2.3 | NS |
| KRAB                | 3          | 308          | 3.0 | NS |
| <b>All proteins</b> | <b>284</b> | <b>29064</b> |     |    |

The results shown are based on 284 proteins in the cancer set for which an amino-acid sequence could be obtained. These proteins have been compared both with the number of proteins in the human proteome with a particular Pfam domain, and with the expected number of proteins with the domain in a randomly chosen sample of 284 human proteins. The non-redundant human Swiss-Prot/TrEMBL proteome set (29,064 proteins) from the European Bioinformatics Institute was used as the reference human proteome set (<http://www.ebi.ac.uk/proteome/>). S, probabilities that are significant at 5% significance; NS, probabilities that are not significant.
