# Supplementary material for: A census of human cancer genes
Source: Springer Nature journal article supplement (doi:10.1038/nrc1299), 2004-03-01
Supplement: 41568_2004_BFnrc1299_MOESM3_ESM.pdf [file 41568_2004_BFnrc1299_MOESM3_ESM.pdf]

| Pfam domain    | Number of cancer proteins with domain | Dominant versus recessive |           |         | Germine versus somatic |            |                    | Cell type   |       |               | Translocation versus no translocation |  |
|----------------|---------------------------------------|---------------------------|-----------|---------|------------------------|------------|--------------------|-------------|-------|---------------|---------------------------------------|--|
|                |                                       | Dominant                  | Recessive | Germine | Somatic                | Epithelial | Leukaemia/lymphoma | Mesenchymal | Other | Translocation | No translocation                      |  |
| Pkinase        | 27                                    | 24                        | 3         | 5       | 22                     | 13         | 11                 | 6           | 5     | 11            | 16                                    |  |
| HLH            | 12                                    | 12                        | 0         | 0       | 12                     | 4          | 7                  | 2           | 1     | 9             | 3                                     |  |
| Homeobox       | 13                                    | 13                        | 0         | 0       | 13                     | 0          | 11                 | 2           | 0     | 13            | 0                                     |  |
| Ets            | 6                                     | 6                         | 0         | 0       | 6                      | 1          | 1                  | 6           | 0     | 6             | 0                                     |  |
| PAX            | 4                                     | 4                         | 0         | 0       | 4                      | 1          | 1                  | 2           | 0     | 4             | 0                                     |  |
| PHD            | 8                                     | 8                         | 0         | 0       | 8                      | 1          | 7                  | 0           | 0     | 8             | 0                                     |  |
| DNA_mis_repair | 3                                     | 0                         | 3         | 3       | 0                      | 3          | 0                  | 0           | 1     | 0             | 3                                     |  |
| HATPase_c      | 5                                     | 2                         | 3         | 3       | 2                      | 3          | 2                  | 0           | 1     | 2             | 3                                     |  |
| Myc_N_term     | 3                                     | 3                         | 0         | 0       | 3                      | 2          | 1                  | 0           | 1     | 0             | 3                                     |  |
| AF-4           | 3                                     | 3                         | 0         | 0       | 3                      | 0          | 3                  | 0           | 0     | 3             | 0                                     |  |
| Bromodomain    | 5                                     | 4                         | 1         | 0       | 5                      | 3          | 3                  | 0           | 0     | 5             | 0                                     |  |
| DUF902         | 2                                     | 1                         | 1         | 0       | 2                      | 1          | 2                  | 0           | 0     | 2             | 0                                     |  |
| KIX            | 2                                     | 1                         | 1         | 0       | 2                      | 1          | 2                  | 0           | 0     | 2             | 0                                     |  |
| SH2            | 7                                     | 7                         | 0         | 0       | 7                      | 0          | 5                  | 2           | 0     | 6             | 1                                     |  |
| PWWP           | 4                                     | 3                         | 1         | 1       | 3                      | 1          | 3                  | 0           | 0     | 3             | 1                                     |  |
| DUF906         | 2                                     | 1                         | 1         | 0       | 2                      | 1          | 2                  | 0           | 0     | 2             | 0                                     |  |
| HRDC           | 2                                     | 0                         | 2         | 2       | 0                      | 2          | 2                  | 1           | 1     | 0             | 2                                     |  |
| zf-TAZ         | 2                                     | 1                         | 1         | 0       | 2                      | 1          | 2                  | 0           | 0     | 2             | 0                                     |  |
| ETS_PEA3_N     | 2                                     | 2                         | 0         | 0       | 2                      | 0          | 0                  | 2           | 0     | 2             | 0                                     |  |
| SAM_PNT        | 3                                     | 3                         | 0         | 0       | 3                      | 1          | 1                  | 3           | 0     | 3             | 0                                     |  |
| Muts_I         | 2                                     | 0                         | 2         | 2       | 0                      | 2          | 0                  | 0           | 0     | 0             | 2                                     |  |
| Exostoin       | 2                                     | 0                         | 2         | 2       | 0                      | 0          | 0                  | 2           | 0     | 0             | 2                                     |  |
| SSXT           | 2                                     | 2                         | 0         | 0       | 2                      | 0          | 0                  | 2           | 0     | 2             | 0                                     |  |
| Nucleopotin_FG | 2                                     | 2                         | 0         | 0       | 2                      | 0          | 2                  | 0           | 0     | 2             | 0                                     |  |
| Muts_II        | 2                                     | 0                         | 2         | 2       | 0                      | 2          | 0                  | 0           | 0     | 0             | 2                                     |  |
| SH3            | 9                                     | 9                         | 0         | 0       | 9                      | 0          | 8                  | 1           | 0     | 9             | 0                                     |  |
| GTP_CDC        | 3                                     | 3                         | 0         | 0       | 3                      | 0          | 3                  | 0           | 0     | 3             | 0                                     |  |
| DEAD           | 5                                     | 2                         | 3         | 3       | 2                      | 2          | 4                  | 2           | 1     | 2             | 3                                     |  |
| ERM            | 2                                     | 1                         | 1         | 1       | 1                      | 0          | 1                  | 0           | 1     | 1             | 1                                     |  |
| YEATS          | 2                                     | 2                         | 0         | 0       | 2                      | 0          | 2                  | 0           | 0     | 2             | 0                                     |  |
| HSP90          | 2                                     | 2                         | 0         | 0       | 2                      | 0          | 2                  | 0           | 0     | 2             | 0                                     |  |
| Muts_IV        | 2                                     | 0                         | 2         | 2       | 0                      | 2          | 0                  | 0           | 0     | 0             | 2                                     |  |
| AT_hook        | 3                                     | 3                         | 0         | 0       | 3                      | 0          | 1                  | 2           | 0     | 3             | 0                                     |  |
| Helicase_C     | 6                                     | 2                         | 4         | 4       | 2                      | 3          | 4                  | 2           | 1     | 2             | 4                                     |  |
| Muts_III       | 2                                     | 0                         | 2         | 2       | 0                      | 2          | 0                  | 0           | 0     | 0             | 2                                     |  |
| Recep_L_domain | 2                                     | 2                         | 0         | 0       | 2                      | 1          | 0                  | 0           | 1     | 0             | 2                                     |  |





|                 |   |   |   |   |   |   |   |   |   |   |   |   |   |   |   |
|-----------------|---|---|---|---|---|---|---|---|---|---|---|---|---|---|---|
| MoCF_biosynth   | 1 | 1 | 0 | 0 | 1 | 1 | 0 | 1 | 1 | 0 | 0 | 0 | 0 | 1 | 0 |
| FYRC            | 1 | 1 | 0 | 0 | 1 | 1 | 0 | 1 | 0 | 1 | 0 | 0 | 0 | 1 | 0 |
| HhH-GPD         | 1 | 0 | 1 | 1 | 0 | 1 | 1 | 0 | 0 | 0 | 0 | 0 | 0 | 1 | 0 |
| pkID            | 1 | 1 | 0 | 0 | 1 | 1 | 1 | 0 | 1 | 1 | 0 | 1 | 0 | 1 | 0 |
| L_LWEQ          | 1 | 1 | 0 | 0 | 1 | 1 | 0 | 1 | 1 | 0 | 1 | 0 | 1 | 0 | 0 |
| Glypican        | 1 | 0 | 1 | 0 | 1 | 1 | 0 | 1 | 0 | 0 | 0 | 1 | 1 | 0 | 1 |
| notch           | 1 | 1 | 0 | 0 | 1 | 1 | 0 | 1 | 1 | 1 | 0 | 0 | 1 | 0 | 0 |
| GATase          | 1 | 1 | 0 | 0 | 1 | 1 | 0 | 1 | 1 | 1 | 0 | 0 | 1 | 1 | 0 |
| PBX             | 1 | 1 | 0 | 0 | 1 | 1 | 0 | 1 | 1 | 1 | 0 | 0 | 1 | 1 | 0 |
| TFR_dimer       | 1 | 1 | 0 | 0 | 1 | 1 | 0 | 1 | 1 | 0 | 0 | 0 | 1 | 1 | 0 |
| BCL_N           | 1 | 1 | 0 | 0 | 1 | 1 | 0 | 1 | 1 | 1 | 0 | 0 | 1 | 1 | 0 |
| PAS             | 2 | 2 | 0 | 0 | 2 | 2 | 0 | 2 | 2 | 0 | 0 | 0 | 2 | 2 | 0 |
| zf-B_box        | 3 | 3 | 0 | 0 | 3 | 3 | 1 | 2 | 2 | 0 | 0 | 0 | 3 | 3 | 0 |
| fer2            | 1 | 0 | 1 | 1 | 0 | 0 | 0 | 0 | 0 | 0 | 0 | 1 | 0 | 0 | 1 |
| XPg_N           | 1 | 0 | 1 | 1 | 0 | 0 | 1 | 0 | 0 | 0 | 0 | 0 | 0 | 0 | 1 |
| Patched         | 1 | 0 | 1 | 1 | 0 | 1 | 1 | 0 | 1 | 0 | 1 | 0 | 0 | 0 | 1 |
| RBD             | 1 | 1 | 0 | 0 | 1 | 1 | 0 | 1 | 0 | 0 | 0 | 0 | 0 | 0 | 1 |
| FAT             | 1 | 0 | 1 | 1 | 0 | 1 | 0 | 1 | 1 | 1 | 1 | 1 | 0 | 1 | 1 |
| Clathrin        | 1 | 1 | 0 | 0 | 1 | 1 | 0 | 1 | 1 | 0 | 1 | 0 | 1 | 1 | 0 |
| ras             | 4 | 4 | 0 | 0 | 4 | 4 | 2 | 4 | 4 | 2 | 4 | 2 | 1 | 1 | 3 |
| 3_5_exonuclease | 1 | 0 | 1 | 1 | 0 | 1 | 1 | 0 | 1 | 1 | 1 | 1 | 1 | 0 | 1 |
| DIL             | 1 | 1 | 0 | 0 | 1 | 1 | 0 | 1 | 1 | 0 | 1 | 0 | 0 | 1 | 0 |
| MH2             | 1 | 0 | 1 | 1 | 0 | 1 | 1 | 0 | 1 | 0 | 0 | 0 | 0 | 0 | 1 |
| BTK             | 1 | 1 | 0 | 0 | 1 | 1 | 0 | 1 | 0 | 0 | 1 | 0 | 1 | 1 | 0 |
| Anti_proliferat | 1 | 1 | 0 | 0 | 1 | 1 | 0 | 1 | 0 | 0 | 1 | 0 | 0 | 1 | 0 |
| myosin_head     | 2 | 2 | 0 | 0 | 2 | 2 | 0 | 2 | 2 | 0 | 0 | 0 | 2 | 2 | 0 |
| NAC             | 1 | 1 | 0 | 0 | 1 | 1 | 0 | 1 | 0 | 0 | 0 | 0 | 1 | 0 | 0 |
| HHH             | 1 | 0 | 1 | 1 | 0 | 1 | 1 | 0 | 0 | 0 | 0 | 0 | 0 | 0 | 1 |
| FATC            | 1 | 0 | 1 | 1 | 0 | 1 | 0 | 1 | 1 | 1 | 1 | 1 | 1 | 0 | 1 |
| Peptidase_M28   | 1 | 1 | 0 | 0 | 1 | 1 | 0 | 1 | 1 | 0 | 0 | 0 | 1 | 1 | 0 |
| WH1             | 1 | 0 | 1 | 1 | 0 | 0 | 0 | 1 | 1 | 0 | 0 | 0 | 0 | 0 | 1 |
| Nebulin         | 1 | 1 | 0 | 0 | 1 | 1 | 0 | 1 | 1 | 0 | 0 | 0 | 1 | 1 | 0 |
| UBA             | 2 | 2 | 0 | 0 | 2 | 2 | 0 | 2 | 2 | 0 | 0 | 0 | 2 | 2 | 0 |
| SET             | 2 | 2 | 0 | 0 | 2 | 2 | 0 | 2 | 2 | 0 | 0 | 0 | 2 | 2 | 0 |
| IRF             | 1 | 1 | 0 | 0 | 1 | 1 | 0 | 1 | 1 | 0 | 0 | 0 | 1 | 1 | 0 |
| PDGF            | 1 | 1 | 0 | 0 | 1 | 1 | 0 | 1 | 1 | 0 | 1 | 1 | 0 | 1 | 0 |
| Rlia            | 1 | 1 | 1 | 1 | 0 | 1 | 1 | 0 | 1 | 0 | 1 | 0 | 0 | 1 | 1 |
| BIR             | 1 | 1 | 0 | 0 | 1 | 1 | 0 | 1 | 1 | 0 | 0 | 0 | 1 | 1 | 0 |
| RHD             | 1 | 1 | 0 | 0 | 1 | 1 | 0 | 1 | 1 | 0 | 0 | 0 | 0 | 0 | 1 |
| Activin_recp    | 1 | 0 | 1 | 1 | 0 | 0 | 1 | 0 | 0 | 0 | 0 | 0 | 0 | 0 | 1 |

|                 |    |    |   |   |   |    |   |   |   |   |   |   |   |   |   |   |
|-----------------|----|----|---|---|---|----|---|---|---|---|---|---|---|---|---|---|
| ZF-C3HC4        | 5  | 4  | 1 | 1 | 4 | 1  | 4 | 1 | 4 | 1 | 4 | 0 | 0 | 4 | 1 | 0 |
| cyclin_C        | 1  | 1  | 0 | 0 | 1 | 1  | 1 | 1 | 1 | 1 | 1 | 0 | 0 | 1 | 1 | 0 |
| Fizzled         | 1  | 1  | 0 | 0 | 1 | 1  | 1 | 1 | 0 | 0 | 0 | 0 | 0 | 0 | 0 | 1 |
| OAR             | 1  | 1  | 0 | 0 | 1 | 0  | 1 | 0 | 1 | 0 | 1 | 0 | 0 | 1 | 0 | 0 |
| MH1             | 1  | 0  | 1 | 1 | 0 | 1  | 0 | 1 | 0 | 0 | 0 | 0 | 0 | 0 | 0 | 1 |
| Peptidase_C14   | 1  | 1  | 0 | 0 | 1 | 0  | 1 | 0 | 1 | 0 | 1 | 0 | 0 | 1 | 0 | 0 |
| Rap_GAP         | 1  | 0  | 1 | 1 | 0 | 1  | 0 | 1 | 0 | 0 | 0 | 0 | 1 | 0 | 0 | 1 |
| CAP_GLY         | 1  | 0  | 1 | 1 | 0 | 1  | 0 | 1 | 0 | 0 | 0 | 0 | 0 | 0 | 0 | 1 |
| ig              | 11 | 11 | 0 | 0 | 1 | 10 | 3 | 7 | 4 | 2 | 5 | 6 |   |   |   |   |
| RasGAP          | 1  | 0  | 1 | 1 | 0 | 0  | 0 | 0 | 0 | 0 | 1 | 0 | 1 | 0 | 1 | 1 |
| NAP             | 1  | 1  | 0 | 0 | 1 | 1  | 0 | 1 | 0 | 0 | 1 | 0 | 0 | 1 | 0 | 0 |
| GATA            | 1  | 1  | 0 | 0 | 1 | 0  | 0 | 1 | 0 | 0 | 0 | 0 | 0 | 0 | 0 | 1 |
| WD40            | 1  | 0  | 1 | 1 | 0 | 0  | 1 | 0 | 0 | 0 | 0 | 0 | 0 | 0 | 0 | 1 |
| COLF1           | 1  | 1  | 0 | 0 | 1 | 1  | 0 | 0 | 1 | 0 | 0 | 1 | 0 | 1 | 0 | 0 |
| DAG_PE-bind     | 2  | 2  | 0 | 0 | 2 | 2  | 1 | 0 | 1 | 0 | 0 | 1 | 0 | 1 | 1 | 1 |
| ZF-OXXC         | 1  | 1  | 0 | 0 | 1 | 1  | 0 | 1 | 0 | 0 | 0 | 0 | 0 | 1 | 0 | 0 |
| BTB             | 3  | 3  | 0 | 0 | 0 | 3  | 0 | 2 | 1 | 0 | 2 | 1 | 0 | 2 | 1 | 1 |
| Bcl-2           | 1  | 1  | 0 | 0 | 1 | 0  | 0 | 1 | 0 | 0 | 0 | 0 | 0 | 1 | 0 | 0 |
| PB1             | 1  | 1  | 0 | 0 | 1 | 1  | 1 | 1 | 0 | 0 | 0 | 0 | 0 | 1 | 0 | 0 |
| UBX             | 1  | 1  | 0 | 0 | 1 | 1  | 0 | 0 | 1 | 0 | 0 | 1 | 0 | 1 | 0 | 0 |
| MAM             | 1  | 1  | 0 | 0 | 1 | 1  | 0 | 1 | 0 | 0 | 0 | 0 | 0 | 1 | 0 | 0 |
| NACHT           | 1  | 1  | 0 | 0 | 1 | 1  | 0 | 1 | 0 | 0 | 0 | 0 | 0 | 1 | 0 | 0 |
| WH2             | 1  | 0  | 1 | 0 | 0 | 0  | 0 | 1 | 0 | 0 | 0 | 0 | 0 | 0 | 0 | 1 |
| PA              | 1  | 1  | 0 | 0 | 1 | 1  | 0 | 1 | 0 | 0 | 0 | 0 | 0 | 1 | 0 | 0 |
| RhoGEF          | 2  | 2  | 0 | 0 | 2 | 2  | 0 | 2 | 0 | 0 | 0 | 0 | 0 | 2 | 0 | 0 |
| FCH             | 1  | 1  | 0 | 0 | 1 | 0  | 0 | 1 | 0 | 0 | 0 | 0 | 0 | 1 | 0 | 0 |
| LRRCT           | 2  | 2  | 0 | 0 | 2 | 2  | 2 | 0 | 1 | 0 | 0 | 1 | 0 | 2 | 0 | 0 |
| NLUDIX          | 1  | 0  | 1 | 1 | 0 | 0  | 1 | 0 | 0 | 0 | 0 | 0 | 0 | 0 | 0 | 1 |
| Cadherin_C_term | 1  | 0  | 1 | 1 | 0 | 1  | 1 | 0 | 0 | 0 | 0 | 0 | 0 | 0 | 0 | 1 |
| TNFR_g6         | 1  | 0  | 1 | 0 | 1 | 1  | 1 | 1 | 0 | 0 | 1 | 0 | 0 | 0 | 0 | 1 |
| PBD             | 1  | 0  | 1 | 0 | 0 | 0  | 0 | 1 | 0 | 0 | 0 | 0 | 0 | 0 | 0 | 1 |
| LRR             | 4  | 4  | 0 | 0 | 1 | 3  | 3 | 1 | 1 | 1 | 0 | 0 | 0 | 3 | 1 | 1 |
| PSI             | 1  | 1  | 0 | 0 | 1 | 1  | 1 | 0 | 0 | 0 | 0 | 0 | 0 | 0 | 0 | 1 |
| PI3_P14_kinase  | 1  | 0  | 1 | 1 | 0 | 0  | 0 | 1 | 1 | 1 | 1 | 0 | 1 | 0 | 0 | 1 |
| G-alpha         | 1  | 1  | 0 | 0 | 1 | 1  | 1 | 0 | 0 | 0 | 0 | 0 | 0 | 0 | 0 | 1 |
| BRCT            | 1  | 0  | 1 | 1 | 0 | 0  | 1 | 0 | 0 | 0 | 0 | 0 | 0 | 0 | 0 | 1 |
| Fz              | 1  | 1  | 0 | 0 | 1 | 1  | 1 | 0 | 0 | 0 | 0 | 0 | 0 | 0 | 0 | 1 |
| SAP             | 1  | 1  | 0 | 0 | 1 | 1  | 0 | 1 | 0 | 0 | 0 | 0 | 0 | 1 | 0 | 0 |
| IQ              | 2  | 2  | 0 | 0 | 2 | 2  | 0 | 2 | 0 | 0 | 0 | 0 | 0 | 2 | 0 | 0 |
| cyclin          | 1  | 1  | 0 | 0 | 1 | 1  | 0 | 1 | 0 | 0 | 0 | 0 | 0 | 1 | 0 | 0 |

|                     |            |            |           |           |            |            |            |           |           |            |            |            |            |            |            |
|---------------------|------------|------------|-----------|-----------|------------|------------|------------|-----------|-----------|------------|------------|------------|------------|------------|------------|
| cNMP_binding        | 1          | 1          | 1         | 1         | 0          | 1          | 0          | 1         | 0         | 1          | 0          | 0          | 0          | 1          | 0          |
| AMIP_binding        | 1          | 1          | 0         | 0         | 0          | 1          | 0          | 1         | 0         | 1          | 1          | 0          | 1          | 0          | 0          |
| rnm                 | 4          | 4          | 0         | 0         | 0          | 4          | 1          | 2         | 3         | 0          | 0          | 4          | 0          | 0          | 0          |
| kazal               | 1          | 1          | 0         | 0         | 0          | 1          | 0          | 1         | 0         | 0          | 0          | 1          | 0          | 0          | 0          |
| Sema                | 1          | 1          | 0         | 0         | 0          | 1          | 1          | 0         | 0         | 0          | 0          | 0          | 0          | 1          | 1          |
| zf-C2H2             | 10         | 8          | 2         | 2         | 1          | 9          | 1          | 7         | 1         | 1          | 2          | 7          | 3          | 3          | 3          |
| RA                  | 1          | 1          | 0         | 0         | 0          | 1          | 0          | 1         | 0         | 0          | 0          | 0          | 1          | 0          | 0          |
| pklnase_C           | 1          | 1          | 0         | 0         | 0          | 1          | 1          | 0         | 0         | 0          | 0          | 0          | 0          | 1          | 1          |
| EGF                 | 1          | 1          | 0         | 0         | 0          | 1          | 0          | 1         | 0         | 0          | 0          | 1          | 0          | 0          | 0          |
| histone             | 1          | 1          | 0         | 0         | 0          | 1          | 0          | 1         | 0         | 0          | 0          | 1          | 1          | 0          | 0          |
| bZIP                | 1          | 1          | 0         | 0         | 0          | 1          | 1          | 0         | 1         | 0          | 0          | 1          | 1          | 0          | 0          |
| LRRNT               | 1          | 1          | 0         | 0         | 0          | 1          | 1          | 0         | 1         | 0          | 0          | 1          | 0          | 1          | 0          |
| Y_phosphatase       | 1          | 1          | 0         | 0         | 0          | 1          | 0          | 1         | 0         | 0          | 0          | 0          | 0          | 1          | 1          |
| cadherin            | 2          | 1          | 1         | 1         | 2          | 0          | 2          | 0         | 0         | 0          | 1          | 1          | 0          | 2          | 2          |
| ank                 | 3          | 2          | 1         | 1         | 1          | 2          | 1          | 3         | 1         | 1          | 1          | 2          | 1          | 1          | 1          |
| HMG_box             | 1          | 0          | 1         | 1         | 1          | 0          | 1          | 0         | 0         | 0          | 0          | 0          | 0          | 1          | 1          |
| WW                  | 1          | 1          | 0         | 0         | 0          | 1          | 0          | 1         | 0         | 0          | 0          | 0          | 1          | 0          | 0          |
| UCH                 | 1          | 1          | 1         | 1         | 1          | 0          | 1          | 0         | 0         | 0          | 0          | 0          | 0          | 1          | 1          |
| CH                  | 1          | 1          | 0         | 0         | 0          | 1          | 0          | 1         | 0         | 0          | 0          | 1          | 1          | 0          | 0          |
| PDZ                 | 2          | 2          | 0         | 0         | 0          | 2          | 0          | 2         | 0         | 0          | 0          | 2          | 2          | 0          | 0          |
| PH                  | 3          | 3          | 0         | 0         | 0          | 3          | 1          | 1         | 1         | 0          | 0          | 2          | 1          | 1          | 1          |
| C2                  | 1          | 1          | 0         | 0         | 0          | 1          | 1          | 1         | 0         | 0          | 0          | 1          | 1          | 0          | 0          |
| Collagen            | 1          | 1          | 0         | 0         | 0          | 1          | 0          | 0         | 1         | 0          | 0          | 1          | 1          | 0          | 0          |
| efhand              | 2          | 2          | 0         | 0         | 0          | 2          | 0          | 2         | 0         | 0          | 0          | 2          | 2          | 0          | 0          |
| KRAB                | 3          | 3          | 0         | 0         | 0          | 3          | 0          | 0         | 3         | 0          | 0          | 3          | 0          | 3          | 0          |
| <b>All proteins</b> | <b>284</b> | <b>156</b> | <b>87</b> | <b>78</b> | <b>154</b> | <b>103</b> | <b>143</b> | <b>63</b> | <b>44</b> | <b>136</b> | <b>106</b> | <b>106</b> | <b>106</b> | <b>106</b> | <b>106</b> |
